# Supplementary material for: Role of chemical production and depositional losses on formaldehyde in the Community Regional Atmospheric Chemistry Multiphase Mechanism (CRACMM)
Source: Copernicus journal article supplement (doi:10.5194/egusphere-2024-1680), 2024-06-19
Supplement: Supplementary file 1 [file egusphere-2024-1680-supplement.pdf]

Supplemental information for:

# **Role of chemical production and depositional losses on formaldehyde in the Community Regional Atmospheric Chemistry Multiphase Mechanism (CRACMM)**

5 T. Nash Skipper, et al.

*Correspondence to:* Havala O.T. Pye (pye.havala@epa.gov)

## Primary HCHO and total ROC emissions

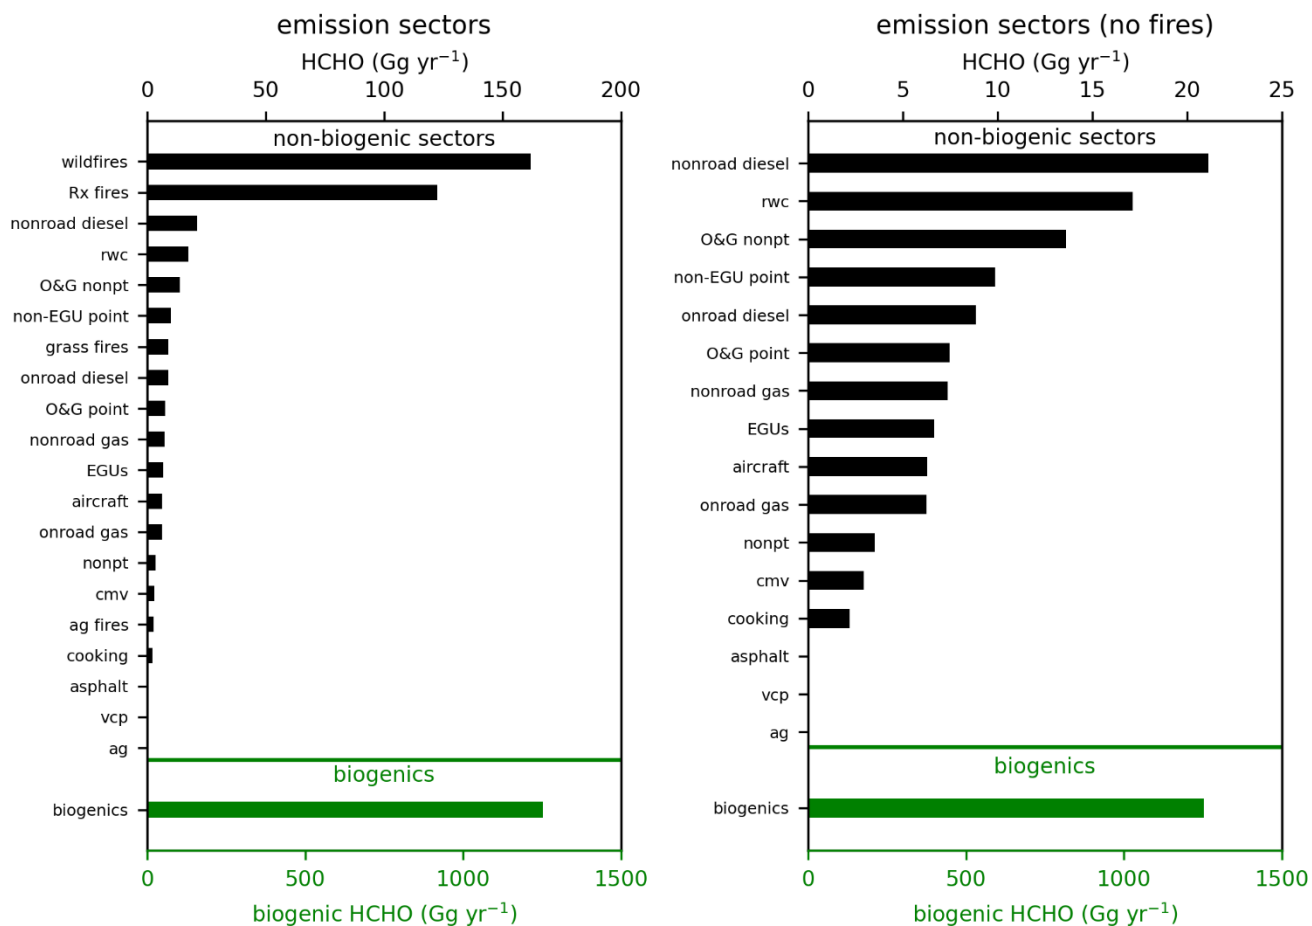

10

**Figure S1. Primary HCHO by emission sector. Fires are included in the left panel and excluded on the right panel so that non-fire emission sector contributions can be seen in more detail.**

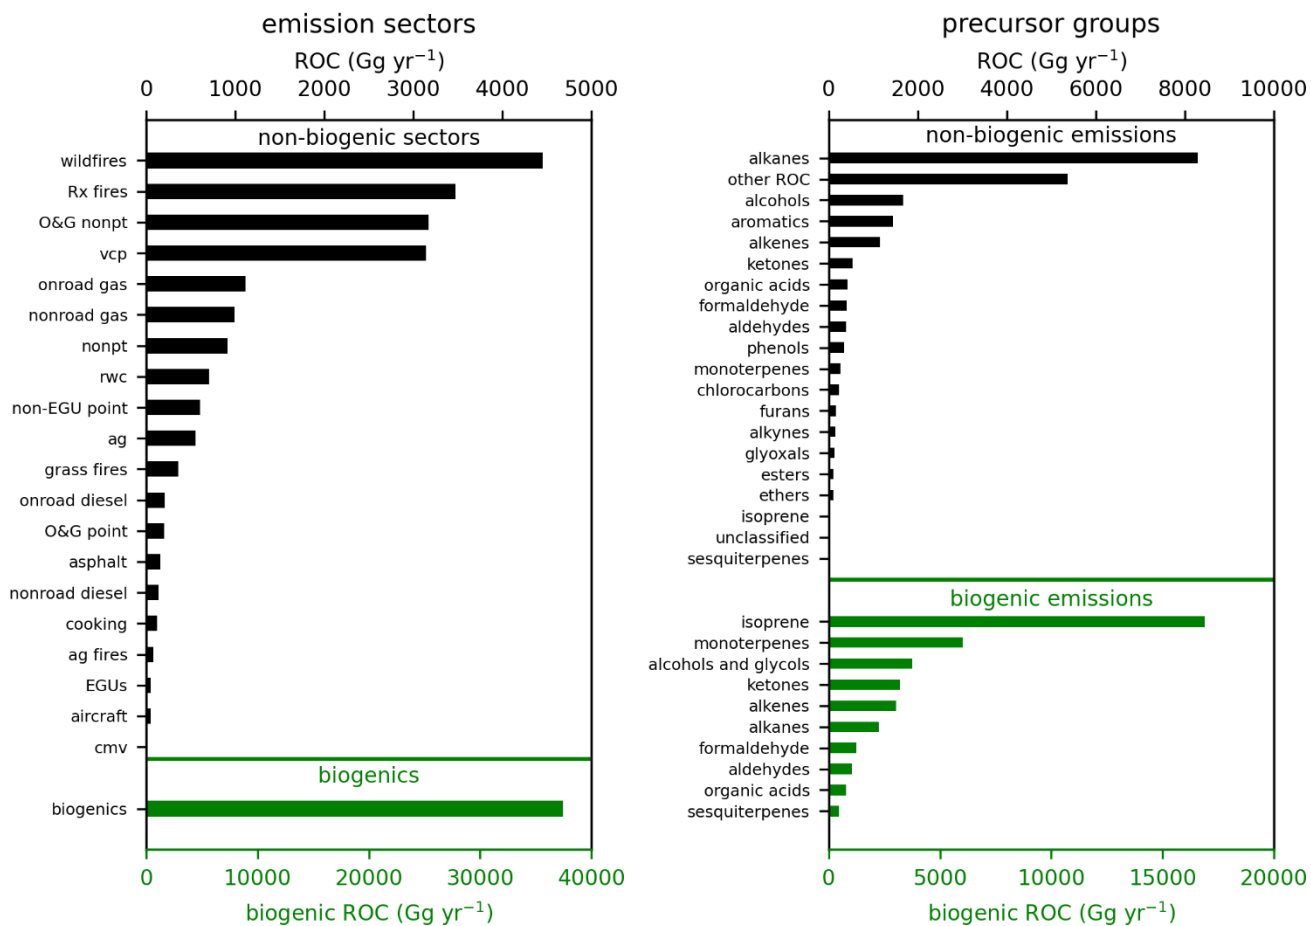

15 **Figure S2. Total gas phase reactive organic carbon (ROC) emissions by emissions sector (left) and precursor group (right). Totals by emission sector (left) exclude primary HCHO which is shown separately in Figure S1. Totals by precursor group (right) show primary HCHO separately from other aldehydes.**

## Additional information on F0AM simulations

- 20 **Table S1. Description of each emission sector used in the F0AM box modeling simulations. Most descriptions are based on information provided with the 2019 Emissions Modeling Platform (U.S. EPA, 2022).**

| Sector         | Description                                                                |
|----------------|----------------------------------------------------------------------------|
| biogenics      | Emissions from BEIS; typically simulated in-line in CMAQ                   |
| wildfires      | Wildfire emissions                                                         |
| Rx fires       | Prescribed (Rx) burning emissions                                          |
| grass fires    | Grassland burning emissions                                                |
| ag fires       | Agricultural burning emissions                                             |
| rwc            | Residential wood combustion emissions                                      |
| O&G point      | Point source oil and gas emissions                                         |
| O&G nonpt      | Area source oil and gas emissions                                          |
| vcp            | Volatile chemical product emissions                                        |
| onroad gas     | Highway mobile source emissions from gasoline vehicles                     |
| nonroad gas    | Off highway mobile source emissions from gasoline vehicles                 |
| onroad diesel  | Highway mobile source emissions from diesel vehicles                       |
| nonroad diesel | Off highway mobile source emissions from diesel vehicles                   |
| nonpt          | Area source emissions not included in other sectors                        |
| non-EGU point  | Point source emissions from industrial activities (also known as ptnonipm) |
| ag             | Agricultural emissions                                                     |
| asphalt        | Asphalt paving emissions                                                   |
| cooking        | Cooking emissions                                                          |
| EGUs           | Electric generating unit emissions                                         |
| aircraft       | Aircraft emissions                                                         |
| cmv            | Class 1, 2, and 3 commercial marine vessel emissions                       |

- 25 **Table S2. Precursor groups used in F0AM simulations. The MCM column indicates the MCM species included in each group. The CRACMM1 and CRACMM2 columns indicate the species from those mechanisms that best corresponds with each MCM species. Species mappings that differ in CRACMM1 and CRACMM2 are colored blue.**

| group    | MCM     | CRACMM1 | CRACMM2 |
|----------|---------|---------|---------|
| alcohols | CH3OH   | MOH     | MOH     |
|          | C2H5OH  | EOH     | EOH     |
|          | NPROPOL | ROH     | ROH     |
|          | IPROPOL | ROH     | ROH     |
|          | NBUTOL  | ROH     | ROH     |
|          | BUT2OL  | ROH     | ROH     |
|          | IBUTOL  | ROH     | ROH     |
|          | TBUTOL  | ROH     | ROH     |
|          | PECOH   | ROH     | ROH     |
|          | IPEAOH  | ROH     | ROH     |
|          | ME3BUOL | ROH     | ROH     |
|          | IPECOH  | ROH     | ROH     |
|          | IPEBOH  | ROH     | ROH     |

| group        | MCM       | CRACMM1  | CRACMM2  |
|--------------|-----------|----------|----------|
|              | CYHEXOL   | ROH      | ROH      |
|              | MIBKAOH   | HKET     | HKET     |
|              | ETHGLY    | ETEG     | ETEG     |
|              | PROPLGY   | PROG     | PROG     |
|              | MBO       | OLT      | OLT      |
| formaldehyde | HCHO      | HCHO     | HCHO     |
| aldehydes    | CH3CHO    | ACD      | ACD      |
|              | C2H5CHO   | ALD      | ALD      |
|              | C3H7CHO   | ALD      | ALD      |
|              | IPRCHO    | ALD      | ALD      |
|              | C4H9CHO   | ALD      | ALD      |
|              | ACR       | ACRO     | ACRO     |
|              | MACR      | MACR     | MACR     |
|              | C4ALDB    | MACR     | MACR     |
| alkanes      | CH4       | n/a      | ECH4     |
|              | C2H6      | ETH      | ETH      |
|              | C3H8      | HC3      | HC3      |
|              | NC4H10    | HC3      | HC3      |
|              | IC4H10    | HC3      | HC3      |
|              | NC5H12    | HC5      | HC5      |
|              | IC5H12    | HC5      | HC5      |
|              | NEOP      | HC3      | HC3      |
|              | NC6H14    | HC5      | HC5      |
|              | M2PE      | HC5      | HC5      |
|              | M3PE      | HC5      | HC5      |
|              | M22C4     | HC3      | HC3      |
|              | M23C4     | HC5      | HC5      |
|              | NC7H16    | HC10     | HC10     |
|              | M2HEX     | HC5      | HC5      |
|              | M3HEX     | HC5      | HC5      |
|              | NC8H18    | HC10     | HC10     |
|              | NC9H20    | HC10     | HC10     |
|              | NC10H22   | HC10     | HC10     |
|              | NC11H24   | HC10     | HC10     |
|              | NC12H26   | ROCP6ALK | ROCP6ALK |
|              | CHEX      | HC10     | HC10     |
| alkenes      | C2H4      | ETE      | ETE      |
|              | C3H6      | OLT      | OLT      |
|              | BUT1ENE   | OLT      | OLT      |
|              | CBUT2ENE  | OLI      | OLI      |
|              | TBUT2ENE  | OLI      | OLI      |
|              | MEPROPENE | OLT      | OLT      |

| group   | MCM               | CRACMM1 | CRACMM2 |
|---------|-------------------|---------|---------|
|         | PENT1ENE          | OLT     | OLT     |
|         | CPENT2ENE         | OLI     | OLI     |
|         | TPENT2ENE         | OLI     | OLI     |
|         | ME2BUT1ENE        | OLT     | OLT     |
|         | ME3BUT1ENE        | OLT     | OLT     |
|         | ME2BUT2ENE        | OLI     | OLI     |
|         | HEX1ENE           | OLT     | OLT     |
|         | CHEX2ENE          | OLI     | OLI     |
|         | THEX2ENE          | OLI     | OLI     |
|         | DM23BU2ENE        | OLI     | OLI     |
|         | C4H6              | BDE13   | BDE13   |
| alkynes | C2H2              | ACE     | ACE     |
|         | BENZENE           | BEN     | BEN     |
|         | TOLUENE           | TOL     | TOL     |
|         | OXYL              | XYE     | XYL     |
|         | MXYL              | XYM     | XYL     |
|         | PXYL              | XYE     | XYL     |
|         | EBENZ             | XYE     | EBZ     |
|         | PBENZ             | XYE     | XYL     |
|         | IPBENZ            | XYE     | XYL     |
|         | TM123B            | XYM     | XYL     |
|         | TM124B            | XYM     | XYL     |
|         | TM135B            | XYM     | XYL     |
|         | OETHTOL           | XYE     | XYL     |
|         | METHTOL           | XYM     | XYL     |
|         | PETHTOL           | XYE     | XYL     |
|         | DIME35EB          | XYE     | XYL     |
|         | DIET35TOL         | XYM     | XYL     |
|         | STYRENE           | XYM     | STY     |
|         | BENZAL            | BALD    | BALD    |
|         | MCATECHOL         | MCT     | MCT     |
|         | n/a (use<br>MXYL) | NAPH    | NAPH    |
|         | CH3CL             | SLOWROC | SLOWROC |
|         | CH2CL2            | SLOWROC | SLOWROC |
|         | CHCL3             | SLOWROC | SLOWROC |
|         | CH3CCL3           | SLOWROC | SLOWROC |
|         | TCE               | SLOWROC | SLOWROC |
|         | TRICLETH          | OLI     | OLI     |
|         | CDICLETH          | OLI     | OLI     |
|         | TDICLETH          | OLI     | OLI     |
|         | CH2CLCH2CL        | SLOWROC | SLOWROC |

| group          | MCM         | CRACMM1 | CRACMM2 |
|----------------|-------------|---------|---------|
|                | CCL2CH2     | OLT     | OLT     |
|                | CL12PROP    | HC3     | HC3     |
|                | CHCL2CH3    | SLOWROC | SLOWROC |
|                | CH3CH2CL    | HC3     | HC3     |
|                | CHCL2CHCL2  | SLOWROC | SLOWROC |
|                | CH2CLCHCL2  | SLOWROC | SLOWROC |
|                | VINCL       | OLT     | OLT     |
| isoprene       | C5H8        | ISO     | ISO     |
| esters         | CH3OCHO     | SLOWROC | SLOWROC |
|                | METHACET    | SLOWROC | SLOWROC |
|                | ETHACET     | HC3     | HC3     |
|                | NPROACET    | HC3     | HC3     |
|                | IPROACET    | HC3     | HC3     |
|                | NBUTACET    | HC5     | HC5     |
|                | SBUTACET    | HC5     | HC5     |
|                | TBUACET     | HC3     | HC3     |
| ethers         | CH3OCH3     | HC3     | HC3     |
|                | DIETETHER   | HC10    | HC10    |
|                | MTBE        | HC3     | HC3     |
|                | DIIPREETHER | HC10    | HC10    |
|                | ETBE        | HC10    | HC10    |
|                | MO2EOL      | ROH     | ROH     |
|                | EOX2EOL     | ROH     | ROH     |
|                | PR2OHMOX    | ROH     | ROH     |
|                | BUOX2ETOH   | ROH     | ROH     |
|                | BOX2PROL    | ROH     | ROH     |
| ketones        | CH3COCH3    | ACT     | ACT     |
|                | MEK         | MEK     | MEK     |
|                | MPRK        | KET     | KET     |
|                | DIEK        | KET     | KET     |
|                | MIPK        | KET     | KET     |
|                | HEX2ONE     | KET     | KET     |
|                | HEX3ONE     | KET     | KET     |
|                | MIBK        | KET     | KET     |
|                | MTBK        | KET     | KET     |
|                | CYHEXONE    | KET     | KET     |
|                | MVK         | MVK     | MVK     |
| monoterpenes   | APINENE     | API     | API     |
|                | BPINENE     | API     | API     |
|                | LIMONENE    | LIM     | LIM     |
| sesquiterpenes | BCARY       | SESQ    | SESQ    |
| organic acids  | HCOOH       | ORA1    | ORA1    |

| group        | MCM      | CRACMM1 | CRACMM2 |
|--------------|----------|---------|---------|
|              | CH3CO2H  | ORA2    | ORA2    |
|              | PROPACID | ORA2    | ORA2    |
| unclassified | DMM      | HC5     | HC5     |
|              | DMC      | SLOWROC | SLOWROC |
|              | DMS      | HC5     | HC5     |
|              | ETHOX    | SLOWROC | SLOWROC |
|              |          |         |         |
| phenols      | CRESOL   | CSL     | CSL     |
|              | PHENOL   | PHEN    | PHEN    |
| furans       | PXYFUONE | FURAN   | FURAN   |
| glyoxals     | GLYOX    | GLY     | GLY     |
|              | MGLYOX   | MGLY    | MGLY    |

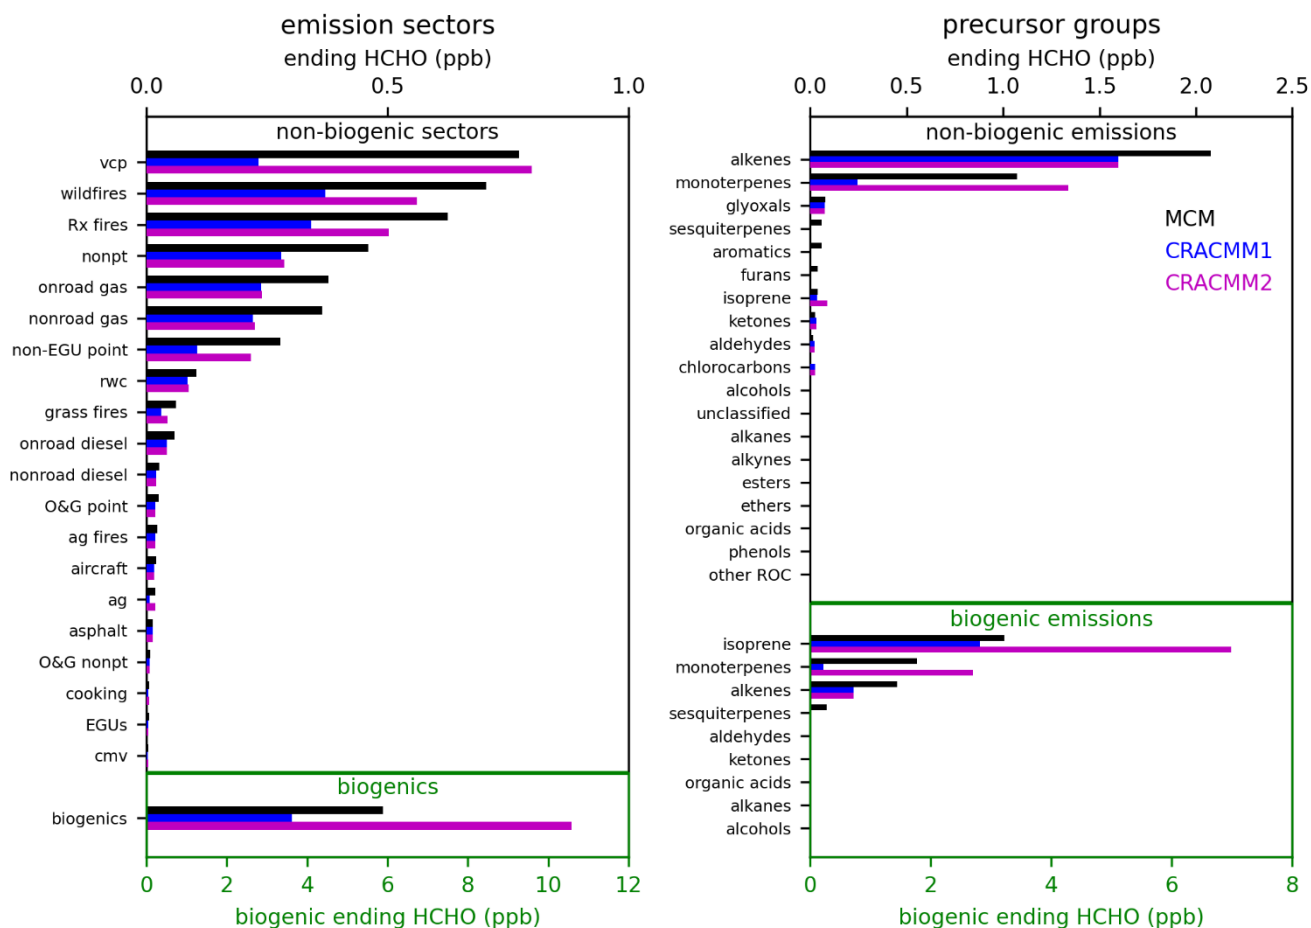

30 Figure S3. Like Figure 1, except that the F0AM simulation holds OH constant at zero and holds ozone constant at 30 ppb. Several categories of precursors have no ozonolysis channel so do not produce any HCHO in these simulations.



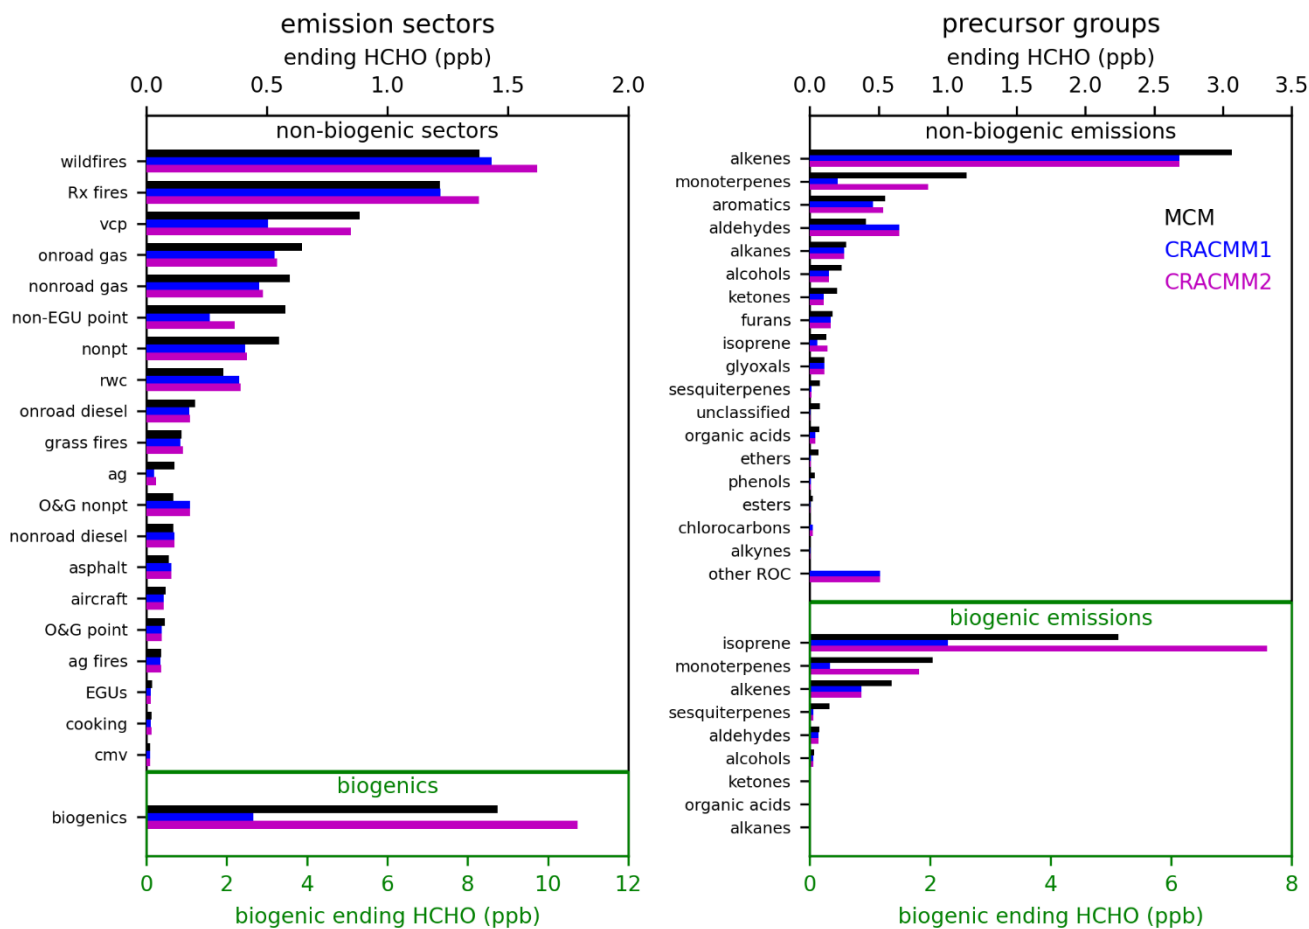

**Figure S4.** Like Figure 1, except that the F0AM simulation holds OH constant at  $10^6$  molecules  $\text{cm}^{-3}$  and holds ozone constant at 30 ppb.

Table S3. Reactions updated in CRACMM2.

| Reaction label | CRACMM1      |                                                                                 |                     | CRACMM2      |                                                                                                                                                                                                                                                        |                      | Note |
|----------------|--------------|---------------------------------------------------------------------------------|---------------------|--------------|--------------------------------------------------------------------------------------------------------------------------------------------------------------------------------------------------------------------------------------------------------|----------------------|------|
|                | reactants    | products                                                                        | rate constant       | reactants    | products                                                                                                                                                                                                                                               | rate constant        |      |
| API system     |              |                                                                                 |                     |              |                                                                                                                                                                                                                                                        |                      |      |
| R189           | APIP1 + NO   | --> 0.82*HO2 + 0.82*NO2 +<br>0.82*PINAL +<br>0.18*TRPN                          | 4.00E-12            | APIP1 + NO   | --> 0.65*(0.23*TRPN +<br>0.77*HO2 + 0.77*NO2 +<br>0.3*PINAL + 0.27*ALD<br>+ 0.09*ACT +<br>0.09*LIMAL +<br>0.21*HCHO +<br>0.11*OPB)<br>+ 0.35*(0.08*ACT +<br>0.49*HCHO +<br>0.2*LIMAL + 0.24*KET<br>+ 0.25*TRPN +<br>0.31*ALD + 0.75*HO2 +<br>0.75*NO2) | 2.70E-12*exp(360/T)  | 1, 3 |
| R339           | APIP1 + NO3  | --> HO2 + NO2 + ALD +<br>KET                                                    | 1.20E-12            | APIP1 + NO3  | --> 0.65*(NO2 + HO2 +<br>0.39*PINAL + 0.35*ALD<br>+ 0.12*ACT +<br>0.12*LIMAL +<br>0.27*HCHO +<br>0.14*OPB)<br>+ 0.35*(0.11*ACT +<br>0.65*HCHO +<br>0.27*LIMAL +<br>0.32*KET + 0.41*ALD +<br>HO2 + NO2)                                                 | 2.30E-12             | 1, 3 |
| R229           | APIP1 + HO2  | --> OPB                                                                         | 1.50E-11            | APIP1 + HO2  | --> 0.65*(0.06*ACT +<br>0.06*LIMAL +<br>0.08*HCHO + 0.65*OPB<br>+ 0.48*HO2 +<br>0.29*PINAL + 0.35*HO)<br>+ 0.35*(0.97*OPB +<br>0.03*HO + 0.03*KET +<br>0.03*HCHO +<br>0.03*HO2)                                                                        | 2.60E-13*exp(1300/T) | 1, 3 |
| R265           | APIP1 + MO2  | --> HO2 + 0.68*HCHO +<br>0.60*PINAL + 0.07*KET<br>+ 0.32*MOH +<br>0.25*ROH      | 3.56E-14*exp(708/T) | APIP1 + MO2  | --> 0.65*(0.83*HCHO +<br>0.14*LIMAL +<br>0.42*PINAL + 0.2*ALD<br>+ 0.13*OPB +<br>0.17*MOH + 0.11*KET<br>+ 0.06*ACT +<br>1.16*HO2)<br>+ 0.35*(1.4*HCHO +<br>0.37*LIMAL +<br>0.32*KET + 1.5*HO2 +<br>0.08*ACT + 0.31*ALD)                                | 2.00E-12             | 1, 3 |
| R301           | APIP1 + ACO3 | --> 0.63*HO2 + 0.70*MO2 +<br>0.60*PINAL +<br>0.30*ORA2 + 0.07*KET<br>+ 0.25*ROH | 7.40E-13*exp(765/T) | APIP1 + ACO3 | --> 0.65*(0.39*PINAL +<br>0.35*ALD + 0.14*OPB +<br>0.12*ACT +<br>0.12*LIMAL +<br>0.27*HCHO + HO2 +<br>MO2)<br>+ 0.35*(0.32*KET +<br>0.27*LIMAL +<br>0.41*ALD + 0.11*ACT +<br>0.65*HCHO + HO2 +<br>MO2)                                                 | 2.00E-12*exp(500/T)  | 1, 3 |

| Reaction label    | CRACMM1          |                                                                                      |                      | CRACMM2          |                                                                                                                                                                                                                                                        |                      | Note       |
|-------------------|------------------|--------------------------------------------------------------------------------------|----------------------|------------------|--------------------------------------------------------------------------------------------------------------------------------------------------------------------------------------------------------------------------------------------------------|----------------------|------------|
|                   | reactants        | products                                                                             | rate constant        | reactants        | products                                                                                                                                                                                                                                               | rate constant        |            |
| R131              | API + O3         | --> 0.90*HO + 0.90*APIP1 +<br>0.05*APIP2 +<br>0.05*PINAL +<br>0.05*H2O2 + 0.14*CO    | 5.00E-16*exp(-530/T) | API + O3         | --> 0.65*(0.77*HO +<br>0.33*PINALP +<br>0.22*H2O2 +<br>0.39*PINAL +<br>0.01*ORA2 + 0.17*HO2<br>+ 0.17*CO +<br>0.27*HCHO +<br>0.27*RCO3)<br>+ 0.35*(0.51*KET +<br>0.3*HO + 0.3*RCO3 +<br>0.32*H2O2 + 0.19*HC3<br>+ 0.81*HCHO +<br>0.11*OP1 + 0.08*ORA1) | 8.05E-16*exp(-640/T) | 1, 3       |
| TRP14             | APINP1 + NO      | --> 2.00*NO2 + PINAL                                                                 | 4.00E-12             | APINP1 + NO      | --> 0.65*(1.86*NO2 +<br>0.07*TRPN + 0.07*ONIT<br>+ 0.93*PINAL)<br>+ 0.35*(0.54*TRPN +<br>0.07*ONIT + 1.39*NO2<br>+ 0.44*ALD + 0.02*KET<br>+ 0.02*HCHO +<br>0.47*HO2)                                                                                   | 2.7E-12*exp(360/T)   | 1, 3       |
| TRP53             | ---              | --> ---                                                                              | ---                  | APINP1 + NO3     | --> 0.65*(2*NO2 + PINAL)<br>+ 0.35*(1.5*NO2 +<br>0.5*TRPN + 0.48*ALD +<br>0.02*KET + 0.02*HCHO<br>+ 0.5*HO2)                                                                                                                                           | 2.30E-12             | 1, 3       |
| TRP22             | APINP1 + HO2     | --> TRPN                                                                             | 1.50E-11             | APINP1 + HO2     | --> 0.65*(0.3*TRPN +<br>0.7*PINAL + 0.7*NO2 +<br>0.7*HO)<br>+ 0.35*(0.47*HO +<br>0.76*TRPN + 0.22*ALD<br>+ 0.02*KET + 0.24*NO2<br>+ 0.02*HCHO)                                                                                                         | 2.71E-13*exp(1300/T) | 1, 3       |
| TRP30             | APINP1 + MO2     | --> 0.37*HO2 + 0.86*NO2 +<br>0.68*HCHO +<br>0.86*PINAL +<br>0.32*MOH + 0.14*TRPN     | 3.56E-14*exp(708/T)  | APINP1 + MO2     | --> 0.65*(0.18*TRPN +<br>0.95*HCHO +<br>0.05*MOH + 0.82*HO2<br>+ 0.82*NO2 +<br>0.82*PINAL)<br>+ 0.35*(0.64*TRPN +<br>0.02*KET + 0.34*ALD +<br>0.36*NO2 + 1.1*HO2 +<br>0.99*HCHO +<br>0.03*MOH)                                                         | 2.00E-12             | 1, 3       |
| TRP36             | APINP1 +<br>ACO3 | --> 0.86*NO2 + 0.14*TRPN<br>+ 0.86*PINAL +<br>0.70*MO2 + 0.30*ORA2                   | 7.40E-13*exp(765/T)  | APINP1 +<br>ACO3 | --> 0.65*(NO2 + PINAL +<br>MO2) + 0.35*(MO2 +<br>0.5*NO2 + 0.5*TRPN +<br>0.48*ALD + 0.02*KET +<br>0.02*HCHO + 0.5*HO2)                                                                                                                                 | 2.0E-12*exp(500/T)   | 1, 3       |
| TRP19             | PINALP + NO      | --> 0.95*HO2 + 0.95*NO2 +<br>0.05*TRPN +<br>0.95*HCHO + 0.95*KET                     | 2.70E-12*exp(360/T)  | PINALP + NO      | --> 0.36*TRPN + 0.64*HOM<br>+ 0.64*NO2                                                                                                                                                                                                                 | 2.7E-12*exp(360/T)   | 1, 4,<br>5 |
| TRP27             | PINALP + HO2     | --> OPB                                                                              | 2.91E-13*exp(1300/T) | PINALP + HO2     | --> 0.75*OPB + 0.25*HO +<br>0.25*HOM                                                                                                                                                                                                                   | 2.71E-13*exp(1300/T) | 1, 4,<br>5 |
| TRP11             | PINALP           | --> HOM                                                                              | 1                    | PINALP           | --> HOM                                                                                                                                                                                                                                                | 0.029                | 6          |
| <b>LIM system</b> |                  |                                                                                      |                      |                  |                                                                                                                                                                                                                                                        |                      |            |
| R190              | LIMP1 + NO       | --> 0.77*HO2 + 0.77*NO2 +<br>0.49*LIMAL +<br>0.28*HCHO +<br>0.28*UALD +<br>0.23*TRPN | 4.00E-12             | LIMP1 + NO       | --> 0.23*TRPN + 0.77*NO2<br>+ 0.77*LIMAL +<br>0.77*HO2 + 0.43*HCHO                                                                                                                                                                                     | 2.70E-12*exp(360/T)  | 2, 3       |

| Reaction label                    | CRACMM1          |                                                                                                |                      | CRACMM2          |                                                                                                     |                      | Note       |
|-----------------------------------|------------------|------------------------------------------------------------------------------------------------|----------------------|------------------|-----------------------------------------------------------------------------------------------------|----------------------|------------|
|                                   | reactants        | products                                                                                       | rate constant        | reactants        | products                                                                                            | rate constant        |            |
| R340                              | LIMP1 + NO3      | --> HO2 + NO2 +<br>0.38500*OLI +<br>0.38500*HCHO +<br>0.61500*MACR                             | 1.20E-12             | LIMP1 + NO3      | --> NO2 + LIMAL + HO2 +<br>0.56*HCHO                                                                | 2.30E-12             | 2, 3       |
| R230                              | LIMP1 + HO2      | --> OPB                                                                                        | 1.50E-11             | LIMP1 + HO2      | --> 0.9*OPB + 0.1*LIMAL +<br>0.1*HO + 0.1*HO2 +<br>0.06*HCHO                                        | 2.60E-13*exp(1300/T) | 2, 3       |
| R266                              | LIMP1 + MO2      | --> HO2 + HCHO +<br>0.42*LIMAL +<br>0.30*KET + 0.32*MOH<br>+ 0.27*ROH                          | 3.560E-14*exp(708/T) | LIMP1 + MO2      | --> 0.25*MOH + LIMAL +<br>1.03*HCHO + HO2                                                           | 2.00E-12             | 2, 3       |
| R302                              | LIMP1 + ACO3     | --> 0.63*HO2 + 0.70*MO2 +<br>0.42*LIMAL +<br>0.30*KET + 0.30*ORA2<br>+ 0.32*HCHO +<br>0.27*ROH | 7.40E-13*exp(765/T)  | LIMP1 + ACO3     | --> LIMAL + 0.56*HCHO +<br>HO2 + MO2                                                                | 2.00E-12*exp(500/T)  | 2, 3       |
| R132                              | LIM + O3         | --> 0.84*HO + 0.84*LIMP1<br>+ 0.11*LIMP2 +<br>0.05*LIMAL +<br>0.05*H2O2 + 0.14*CO              | 2.95E-15*exp(-783/T) | LIM + O3         | --> 0.66*HO + 0.66*LIMAL<br>+ 0.33*ACO3 +<br>0.33*HCHO +<br>0.33*RCO3 +<br>0.33*H2O2 +<br>0.01*ORA2 | 2.8E-15*exp(-770/T)  | 2, 3       |
| TRP17                             | LIMNP1 + NO      | --> 2.00*NO2 + LIMAL                                                                           | 4.00E-12             | LIMNP1 + NO      | --> 0.57*TRPN + 0.07*ONIT<br>+ 1.36*NO2 +<br>0.43*LIMAL + 0.5*HO2                                   | 2.7E-12*exp(360/T)   | 2, 3       |
| TRP54                             | ---              | --> ---                                                                                        | ---                  | LIMNP1 + NO3     | --> 1.46*NO2 +<br>0.46*LIMAL +<br>0.54*TRPN + 0.54*HO2                                              | 2.30E-12             | 2, 3       |
| TRP25                             | LIMNP1 + HO2     | --> TRPN                                                                                       | 1.50E-11             | LIMNP1 + HO2     | --> 0.77*TRPN + 0.5*HO +<br>0.23*LIMAL +<br>0.23*NO2 + 0.27*HO2                                     | 2.71E-13*exp(1300/T) | 2, 3       |
| TRP33                             | LIMNP1 + MO2     | --> 0.37*HO2 + 0.68*HCHO<br>+ 0.70*LIMAL +<br>0.70*NO2 + 0.32*MOH<br>+ 0.30*TRPN               | 3.56E-14*exp(708/T)  | LIMNP1 + MO2     | --> 0.69*TRPN +<br>0.91*HCHO +<br>0.09*MOH + 1.01*HO2<br>+ 0.31*LIMAL +<br>0.31*NO2                 | 2.00E-12             | 2, 3       |
| TRP39                             | LIMNP1 +<br>ACO3 | --> 0.70*NO2 +<br>0.70*LIMAL +<br>0.30*TRPN + 0.70*MO2<br>+ 0.30*ORA2                          | 7.40E-13*exp(765/T)  | LIMNP1 +<br>ACO3 | --> MO2 + 0.46*NO2 +<br>0.46*LIMAL +<br>0.54*TRPN + 0.54*HO2                                        | 2.0E-12*exp(500/T)   | 2, 3       |
| TRP05                             | LIMAL + HO       | --> 0.70*LIMALP +<br>0.30*RCO3                                                                 | 1.00E-10             | LIMAL + HO       | --> 0.83*LIMALP +<br>0.17*RCO3                                                                      | 1.10E-10             | 2, 3       |
| TRP20                             | LIMALP + NO      | --> 0.94*HO2 + 0.94*NO2 +<br>0.06*TRPN +<br>0.94*HCHO + 0.94*KET                               | 2.70E-12*exp(360/T)  | LIMALP + NO      | --> 0.64*TRPN + 0.36*NO2<br>+ 0.36*HO2 +<br>0.36*HCHO + 0.36*PAA                                    | 2.7E-12*exp(360/T)   | 2, 4,<br>7 |
| TRP28                             | LIMALP + HO2     | --> OPB                                                                                        | 2.91E-13*exp(1300/T) | LIMALP + HO2     | --> 0.9*OPB + 0.1*HO +<br>0.1*HO2 + 0.1*HCHO +<br>0.1*PAA                                           | 2.73E-13*exp(1300/T) | 2, 4,<br>7 |
| TRP12                             | LIMALP           | --> HOM                                                                                        | 1                    | LIMALP           | --> HOM                                                                                             | 0.024                | 6          |
| TRP08                             | LIMAL + O3       | --> 0.04*HO + 0.67*HC10P<br>+ 0.79*HCHO +<br>0.33*KET + 0.04*HO2 +<br>0.20*CO                  | 8.30E-18             | LIMAL + O3       | --> 0.09*HO + ALD +<br>0.62*HCHO + 0.23*OP1<br>+ 0.02*H2O2 +<br>0.15*ORA1                           | 8.30E-18             | 2, 3       |
| <b>Monoterpene nitrate system</b> |                  |                                                                                                |                      |                  |                                                                                                     |                      |            |
| TRP07                             | TRPN + HO        | --> HOM                                                                                        | 4.80E-12             | TRPN + HO        | --> 0.33*HONIT +<br>0.67*NO2 + 0.27*PINAL<br>+ 0.38*KET +<br>0.21*HCHO + 0.02*ALD                   | 4.80E-12             | 8          |
| TRP09                             | TRPN + O3        | --> HOM                                                                                        | 1.67E-16             | TRPN + O3        | --> 0.33*HONIT +<br>0.67*NO2 + 0.27*PINAL<br>+ 0.38*KET +<br>0.21*HCHO + 0.02*ALD                   | 1.67E-16             | 8          |

| Reaction label    | CRACMM1    |                                                                                                                                                                            |                       | CRACMM2     |                                                                                                                                                                 |                                                                                                                                                           | Note      |
|-------------------|------------|----------------------------------------------------------------------------------------------------------------------------------------------------------------------------|-----------------------|-------------|-----------------------------------------------------------------------------------------------------------------------------------------------------------------|-----------------------------------------------------------------------------------------------------------------------------------------------------------|-----------|
|                   | reactants  | products                                                                                                                                                                   | rate constant         | reactants   | products                                                                                                                                                        | rate constant                                                                                                                                             |           |
| TRP10             | TRPN + NO3 | --> HOM                                                                                                                                                                    | 3.15E-14*exp(-448/T)  | TRPN + NO3  | --> 0.33*HONIT +<br>0.67*NO2 + 0.27*PINAL<br>+ 0.38*KET +<br>0.21*HCHO + 0.02*ALD                                                                               | 3.15E-13*exp(-448/T)                                                                                                                                      | 8         |
| TRP55             | ---        | --> ---                                                                                                                                                                    | ---                   | TRPN + hv   | --> NO2 + 0.67*KET +<br>0.33*UALD                                                                                                                               | ONIT_RACM2                                                                                                                                                | 9         |
| TRP56             | ---        | --> ---                                                                                                                                                                    | ---                   | HONIT + hv  | --> HKET + NO2                                                                                                                                                  | ONIT_RACM2                                                                                                                                                | 9         |
| TRP57             | ---        | --> ---                                                                                                                                                                    | ---                   | HONIT + HO  | --> HKET + NO3                                                                                                                                                  | same as HNO3 + OH:<br>xk0=2.40E-<br>14*exp(460/T)<br>xk2=2.70E-<br>17*exp(2199/T)<br>xk3=6.50E-<br>34*exp(1335/T)<br>k =<br>xk0+xk3*M/(1.0+xk3*M/<br>xk2) | 10        |
| TRP58             | ---        | --> ---                                                                                                                                                                    | ---                   | ATRPNJ      | --> AHOMJ + HNO3                                                                                                                                                | 9.26E-05                                                                                                                                                  | 11        |
| TRP59             | ---        | --> ---                                                                                                                                                                    | ---                   | AHONITJ     | --> AHOMJ + HNO3                                                                                                                                                | 9.26E-05                                                                                                                                                  | 11        |
| <b>STY system</b> |            |                                                                                                                                                                            |                       |             |                                                                                                                                                                 |                                                                                                                                                           |           |
| ROCARO71          | ---        | --> ---                                                                                                                                                                    | ---                   | STY + HO    | --> STYP                                                                                                                                                        | 5.80E-11                                                                                                                                                  | 12        |
| ROCARO72          | ---        | --> ---                                                                                                                                                                    | ---                   | STYP + HO2  | --> VROCP3OXY2                                                                                                                                                  | 2.91E-13*exp(1300/T)                                                                                                                                      | 12,<br>13 |
| ROCARO73          | ---        | --> ---                                                                                                                                                                    | ---                   | STYP + NO   | --> NO2 + HO2 + HCHO +<br>BALD                                                                                                                                  | 2.7E-12*exp(360/T)                                                                                                                                        | 12        |
| ROCARO74          | ---        | --> ---                                                                                                                                                                    | ---                   | STYP + NO3  | --> NO2 + HO2 + HCHO +<br>BALD                                                                                                                                  | 2.30E-12                                                                                                                                                  | 12        |
| ROCARO75          | ---        | --> ---                                                                                                                                                                    | ---                   | STYP + MO2  | --> HO2 + HCHO + BALD +<br>0.68*HCHO + 0.37*HO2<br>+ 0.32*MOH                                                                                                   | 2.50E-13                                                                                                                                                  | 12        |
| ROCARO76          | ---        | --> ---                                                                                                                                                                    | ---                   | STYP + ACO3 | --> HO2 + HCHO + BALD +<br>0.7*MO2 + 0.3*ORA2                                                                                                                   | 2.50E-13                                                                                                                                                  | 12        |
| <b>ISO system</b> |            |                                                                                                                                                                            |                       |             |                                                                                                                                                                 |                                                                                                                                                           |           |
| R130/RAM01        | ISO + O3   | --> 0.25*HO + 0.25*HO2 +<br>0.08*MO2 + 0.10*ACO3<br>+ 0.10*MACP +<br>0.09*H2O2 + 0.14*CO +<br>0.58*HCHO +<br>0.46100*MACR +<br>0.18900*MVK +<br>0.28*ORA1 +<br>0.15300*OLT | 7.86E-15*exp(-1913/T) | ISO + O3    | --> 0.25*HO + 0.25*HO2 +<br>0.40*MO2 +<br>0.01800*ACO3 +<br>0.10*MACP +<br>0.09*H2O2 + 0.22*CO +<br>HCHO + 0.30*MACR +<br>0.14*MVK + 0.28*ORA1<br>+ 0.15300*OLT | 1.58E-14*exp(-2000/T)                                                                                                                                     | 14        |
| R145/RAM02        | ISO + NO3  | --> ISON                                                                                                                                                                   | 3.03E-12*exp(-446/T)  | ISO + NO3   | --> 0.40*NO2 +<br>0.04500*ISON +<br>0.35*HCHO +<br>0.55500*INO2 +<br>0.26*MVK +<br>0.02800*MACR                                                                 | 2.95E-12*exp(-450/T)                                                                                                                                      | 14        |
| R086/RAM03        | ISO + HO   | --> ISOP                                                                                                                                                                   | 2.70E-11*exp(390/T)   | ISO + HO    | --> ISOP + 0.25*HCHO +<br>0.03*MACR +<br>0.05*MGLY                                                                                                              | 2.69E-11*exp(390/T)                                                                                                                                       | 14        |
| R228/RAM04        | ISOP + HO2 | --> ISHP                                                                                                                                                                   | 2.05E-13*exp(1300/T)  | ISOP + HO2  | --> ISHP + 0.07*HO2 +<br>0.50*HO                                                                                                                                | 4.50E-13*exp(1300/T)                                                                                                                                      | 14        |
| R188/RAM05        | ISOP + NO  | --> 0.88*HO2 + 0.88*NO2 +<br>0.20*HCHO +<br>0.28*MACR +<br>0.44*MVK + 0.12*ISON<br>+ 0.02100*GLY +<br>0.02900*HKET +<br>0.02700*ALD                                        | 2.43E-12*exp(360/T)   | ISOP + NO   | --> 0.13*ISON +<br>0.40*HCHO + 0.88*HO2<br>+ 0.87*NO2 +<br>0.18*MACR +<br>0.51*MVK                                                                              | 6.00E-12*exp(350/T)                                                                                                                                       | 14        |
| R115/RAM06        | ISHP + HO  | --> HO + MACR +<br>0.90400*IEPOX                                                                                                                                           | 1.00E-10              | ISHP + HO   | --> ISOP                                                                                                                                                        | 4.60E-12*exp(200/T)                                                                                                                                       | 14        |

| Reaction label                 | CRACMM1   |                                   |                     | CRACMM2    |                                                                                                               |                                 | Note |
|--------------------------------|-----------|-----------------------------------|---------------------|------------|---------------------------------------------------------------------------------------------------------------|---------------------------------|------|
|                                | reactants | products                          | rate constant       | reactants  | products                                                                                                      | rate constant                   |      |
| RAM07                          | ---       | --> ---                           | ---                 | ISHP + HO  | --> 0.04*MGLY + 0.02*GLY + 0.13*MVK + 0.44*IEPOX + 0.11*ACO3 + 0.03*MACR + 2.00*HO + 0.34*HO2 + 0.14*IPX + CO | 2.97E-11*exp(390/T)             | 14   |
| RAM08                          | ---       | --> ---                           | ---                 | INO2 + HO2 | --> 0.45*HO + 0.95*INALD + 0.02*IPX                                                                           | 3.14E-11*exp(580/T)             | 14   |
| RAM09                          | ---       | --> ---                           | ---                 | INO2 + NO  | --> 0.15*MVK + 0.65*INALD + 0.05*ISON + 0.20*HCHO + 1.30*NO2                                                  | 9.42E-12*exp(580/T)             | 14   |
| R125/RAM10                     | ISON + HO | --> INALD + 0.07*HKET + 0.07*HCHO | 1.30E-11            | ISON + HO  | --> HO + 0.35*INALD + 0.17*IEPOX + 0.65*NO2                                                                   | 2.40E-11*exp(390/T)             | 14   |
| R124/RAM11                     | NALD + HO | --> NO2 + XO2 + HKET              | 5.60E-12*exp(270/T) | INALD + HO | --> CO + NO2 + 0.30*HO2 + HCHO                                                                                | 1.50E-11                        | 14   |
| RAM12                          | ---       | --> ---                           | ---                 | ISON       | --> HNO3 + ROH                                                                                                | 4.00E-05                        | 14   |
| RAM13                          | ---       | --> ---                           | ---                 | IPX + HO   | --> 0.57*MACR + 0.43*MVK                                                                                      | 3.00E-12                        | 14   |
| <b>Heterogeneous reactions</b> |           |                                   |                     |            |                                                                                                               |                                 |      |
| HET_IPX                        | ---       | --> ---                           | ---                 | IPX        | --> AISO4J                                                                                                    | 2*k <sub>het</sub> IEPOX        | 15   |
| HET_INALD                      | ---       | --> ---                           | ---                 | INALD      | --> AISO5J + HNO3                                                                                             | 0.5*k <sub>het</sub> IEPOX      | 15   |
| HET_HO2                        | ---       | --> ---                           | ---                 | HO2        | --> H2O                                                                                                       | k <sub>het</sub> HO2 (γ = 0.2)  | 16   |
| HET_NO3                        | ---       | --> ---                           | ---                 | NO3        | --> HNO3                                                                                                      | k <sub>het</sub> NO3 (γ = 1E-3) | 17   |
| <b>Methane</b>                 |           |                                   |                     |            |                                                                                                               |                                 |      |
| R364                           | ---       | --> ---                           | ---                 | ECH4 + HO  | --> MO2                                                                                                       | 2.45E-12*exp(-1775/T)           | 18   |

### Notes for Table S3.

45

1. Products in the API system have been updated to include products from  $\alpha$ -pinene and  $\beta$ -pinene, assuming a 65/35 split of  $\alpha$ -/ $\beta$ -pinene (based on biogenic emission totals over the contiguous US). Updated reactions are based on  $\alpha$ -pinene and  $\beta$ -pinene chemistry in the MOZART-TS2 mechanism developed by Schwantes et al. (2020).

50

2. Reactions and products in the LIM system have been updated based on limonene chemistry in the MOZART-TS2 mechanism developed by Schwantes et al. (2020).

3. Species from MOZART-TS2 have been mapped to existing CRACMM species. Mapping from MOZART-TS2 to CRACMM2 includes the following:

55

a. TS2 monoterpene nitrate species were mapped to CRACMM species TRPN.

i. Except TS2 species TERPFDN (monoterpene derived di-nitrate) is mapped to CRACMM species TRPN+ONIT for conservation of nitrogen.

b. TS2 species TERPA is mapped to CRACMM species PINAL.

c. TS2 species TERPA3 is mapped to CRACMM species ALD.

60

d. TS2 species TERPF1 is mapped to CRACMM species LIMAL.

e. TS2 species TERP1OOH and TERPOOH are mapped to CRACMM species OPB.

f. TS2 species TERPK is mapped to CRACMM species KET.

g. TS2 species TERPA2O2 is mapped to CRACMM species PINALP.

h. TS2 species TERPACID is mapped to CRACMM species ORA2.

65

i. TS2 species TERPA2 is mapped to CRACMM species PINAL.

j. TS2 species TERPA2CO3 is mapped to CRACMM species RCO3.

k. TS2 species BIGALK is mapped to CRACMM species HC3.

l. TS2 species HMHP is mapped to CRACMM species OP1.

70

4. The following characteristics of monoterpene aldehyde derived peroxy radical (PINALP and LIMALP) reactions are based on Wennberg et al. (2018):

a. Nitrate (CRACMM species TRPN) branching ratio from reaction with NO

b. Rate of reaction with HO2

c. Yield of peroxide (CRACMM species OPB) from reaction with HO2

75

5. Products of PINALP reaction with NO and HO2 that do not go to TRPN or OPB, respectively, are expected to form a ring-opening peroxy radical that undergoes autoxidation which is mapped to CRACMM species HOM.

- 80 6. Unimolecular autoxidation rates of PINALP and LIMALP are calculated based on Vereecken and Nozière (2020) and assuming that the first competitive step rather than the first step best reflects the rate of HOM formation in a reduced mechanism. Details:
- a. For PINALP rate:
- 85 i. From Table 1  $k(298\text{ K}) = 6.2\text{E-}4\text{ s}^{-1}$  (1,5-H migration; substitution pattern  $-\text{CH} < > \text{C}(\text{OO}\bullet)-$ )
  - ii. From Table 5  $k(298\text{ K})$  correction factor = 47 (exo- $\beta$ -oxo 1,5)
  - iii. Overall  $k = 6.2\text{E-}4 \times 47 = 0.029\text{ s}^{-1}$
- b. For LIMALP rate both 1,5-H shift and 1,6-H shift are possible. We consider both options and add the rate constant from the two options to calculate the overall rate constant:
- 90 i. From Table 1:
    1.  $k_1(298\text{ K}) = 4.49\text{E-}4\text{ s}^{-1}$  (1,5-H migration; substitution pattern  $-\text{CH}_2- > \text{C}(\text{OO}\bullet)-$ )
    2.  $k_2(298\text{ K}) = 3.12\text{E-}4\text{ s}^{-1}$  (1,6-H migration; substitution pattern  $-\text{CH}_2- > \text{C}(\text{OO}\bullet)-$ )
  - ii. From Table 5:
    1.  $k_1(298\text{ K})$  correction factor = 47 (exo- $\beta$ -oxo 1,5)
    2.  $k_2(298\text{ K})$  correction factor = 10 (exo- $\beta$ -oxo 1,6)
  - 95 iii. Overall  $k = 4.49\text{E-}4 \times 47 + 3.12\text{E-}4 \times 10 = 0.024\text{ s}^{-1}$
7. Products of LIMALP reaction with NO and HO<sub>2</sub> that do not go to TRPN or OPB, respectively, are expected to form a peroxy acid (mapped to CRACMM species PAA) and formaldehyde (CRACMM species HCHO).
8. Oxidation of TRPN assumes 1/3 is unsaturated and retains the nitrate group upon oxidation to form HONIT while the remaining 2/3 is saturated and releases the nitrate group to form NO<sub>2</sub> and other products. The 1/3 to 2/3 split is based on Fisher et al. (2016). The coefficients of other products are based on products from  $\alpha$ -pinene and  $\beta$ -pinene derived nitrates in MCM with a 65/35 weighting as described in Note 1 above. From MCM products, we find a 62% yield of PINAL and a 38% yield of a ketone (KET) for  $\alpha$ -pinene and a 92% yield of a ketone (KET) + HCHO and an 8% yield of an aldehyde (ALD) for  $\beta$ -pinene.
- 105 9. Photolysis rates of monoterpene nitrates are set to the same rate as the other organic nitrate species in CRACMM (ONIT). Photolysis products are NO<sub>2</sub> and fragmentation products.
10. Oxidation of HONIT is based on Fisher et al. (2016) and Browne et al. (2014).
- 110 11. ATRPN and AHONIT are expected to undergo hydrolysis with a 3-h lifetime based on Pye et al. (2015).



12. Styrene chemistry is adopted from MCM for CRACMM2.

115 13. MCM predicts a peroxide formed from the reaction of the styrene peroxy radical with HO<sub>2</sub>. In CRACMM2, this  
peroxide is mapped to an oxygenated IVOC with C\*=10<sup>3</sup> μg/m<sup>3</sup> and O:C=0.2 (CRACMM species  
VROCP3OXY2).

120 14. From AMOREv1.2 isoprene condensation of a detailed isoprene mechanism by Wennberg et al. (2018). For more  
details on the initial development of the AMORE technique and condensed isoprene mechanism (i.e.,  
AMOREv1.0), Wiser et al. (2023). For more details specific to AMOREv1.2, see Section 3.1 of the main text.

125 15. Heterogeneous uptake of isoprene derived nitrates (INALD) and isoprene derived tetrafunctional compounds (IPX)  
are set to be proportional to IEPOX uptake.

16. HO<sub>2</sub> radical uptake is based on Ivatt et al. (2022).

17. NO<sub>3</sub> radical uptake is based on Jacob (2000) and Zhu et al. (2024).

130 18. Emitted methane (ECH<sub>4</sub>) is tracked separately to account for effects of methane emissions on top of the global  
average background methane (set to 1850 ppb in CMAQ by default).

## AMORE v1.2 updates overview

135 The AMORE v1.0 Isoprene Mechanism was developed from the Caltech Isoprene Mechanism using a graph theory-based algorithm for the reduction of large chemical mechanisms (Wiser et al., 2023). This mechanism was added as an option in CRACMM1. Subsequent updates were made from new GEOS-Chem data (Yang et al., 2023), CMAQ data and box model results (this work). The updated AMORE v1.2 isoprene mechanism is included with this mechanism update, and includes improved NO<sub>x</sub> chemistry, improved VOC yields, including formaldehyde, and additional SOA pathways from isoprene derived tetrafunctional compounds.

140

GEOS-Chem simulation results showed that the AMORE v1.0 mechanism had elevated NO<sub>x</sub> production leading to increased ozone bias. This was confirmed with CMAQ simulations and replicated in box model simulations, and the NO<sub>x</sub> chemistry was adjusted by reducing the yield of NO<sub>2</sub> to better represent the full reference mechanism, leading to improved NO<sub>x</sub> chemistry and reduced ozone production, which resulted in stronger model agreement with atmospheric data. For further information, see (Yang et al., 2023).

145

CMAQ simulations showed that the AMORE v1.0 formaldehyde yield was notably higher than base CRACMM and higher than TROPOMI measurements, despite the AMORE v1.0 mechanism having strong agreement with box model runs. We found that the cause of this discrepancy was in the tail end production of formaldehyde, which occurs at timescales on the order of multiple days. This long tail formaldehyde production was captured in select box model runs but not in measured data, where transport and condensation would likely limit tail end formaldehyde production. Running the box model with diurnal cycle data reduced the discrepancy between the box model and the measured data. The primary source of formaldehyde in the AMORE mechanism is from the reaction of isoprene with OH. The molar yield of formaldehyde from this reaction was adjusted to determine which value best represented the full mechanism and the intended use in transport models. As shown in Figure S5, in a diurnal cycle run, the 0.25 molar yield mechanism has much stronger agreement with the reference mechanism after one day. From two to three days, the mechanisms begin to diverge, with the reference mechanism having a higher formaldehyde yield. This figure shows the overall net production of formaldehyde, as dilution and formaldehyde decomposition reactions were turned off.

150

155

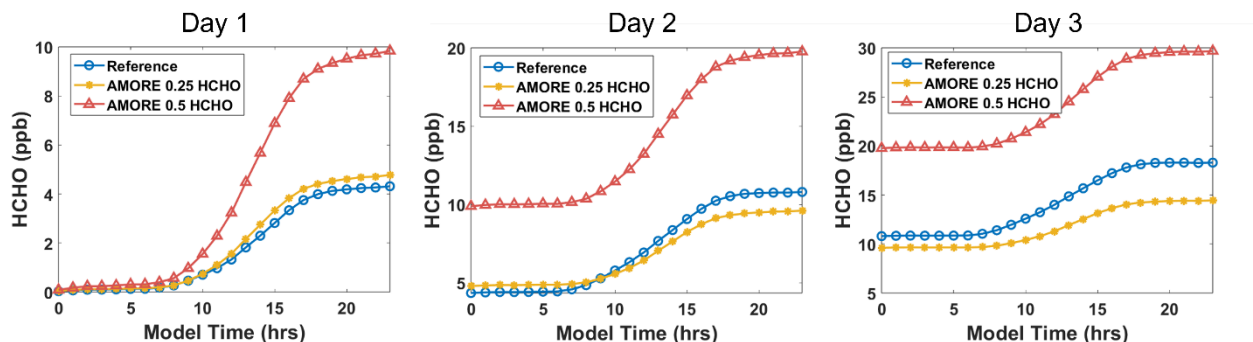

160 Figure S5. Concentration of formaldehyde for the 0.25 molar yield AMORE mechanism vs. the 0.5 molar yield AMORE  
 165 mechanism in comparison to the Caltech Full Reference Isoprene mechanism. These plots show three consecutive days using the F0AM diurnal cycle run with hourly concentration data for isoprene and reactive atmospheric gases along with solar intensity values from 6/30/2013 in Centerville, Alabama. Data is from the SOAS field campaign. Ozone and NOx concentrations are set to zero to focus on the primary formaldehyde pathway from isoprene reacting with OH. Dilution is set to zero and formaldehyde decomposition reactions are removed to demonstrate accumulated yield of formaldehyde over the entire run.

We conducted a run with several different formaldehyde molar yields in CMAQ, ranging from 0.25 to 0.5. The results are shown in Figure S6, with comparisons to the CRACMM1 baseline mechanism and TROPOMI data. All AMORE mechanisms showed increased formaldehyde production from the CRACMM1 baseline mechanism. The CRACMM1 baseline mechanism had negative formaldehyde bias compared to the TROPOMI data. The overall bias was reduced for each  
 170 AMORE mechanism except for the 0.5 molar yield mechanism, which had significant positive formaldehyde bias.

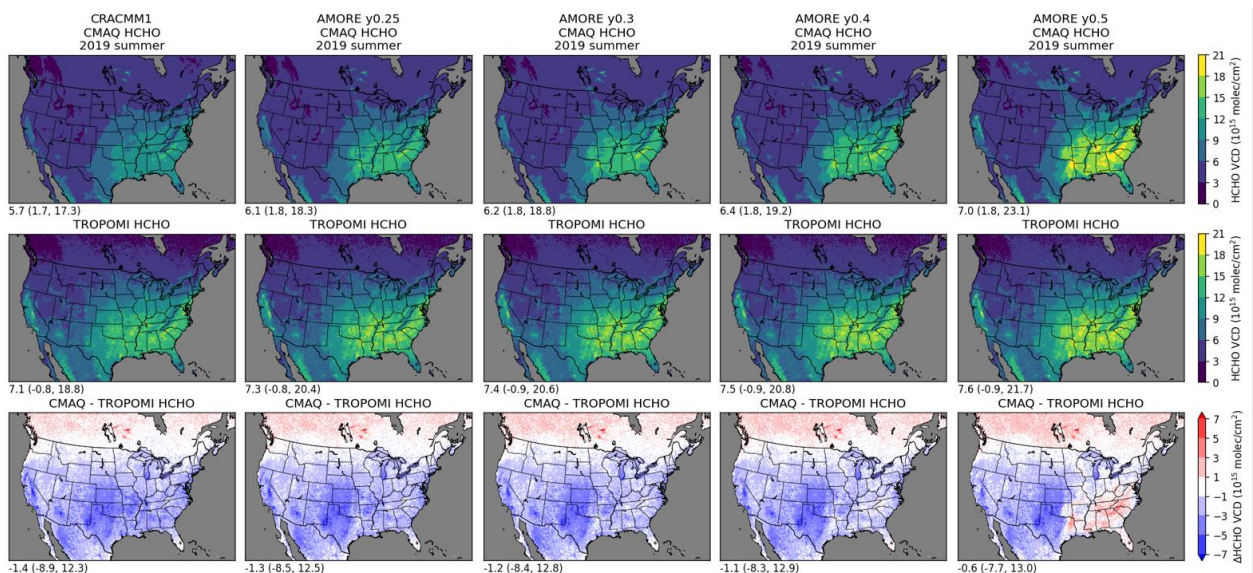

175 Figure S6. CMAQ simulations of 4 different formaldehyde yields for the AMORE mechanism, in comparison to the CRACMM1 baseline mechanism and TROPOMI data. The simulation and data are taken from the summer of 2019. The first row shows the simulated concentration of formaldehyde for each mechanism. The second row shows the measured TROPOMI values, and the final row shows the bias between the simulation and the TROPOMI values.

Ultimately, the TROPOMI data is a useful comparison point but cannot be used to calibrate the formaldehyde yield, as there is no way to isolate isoprene derived formaldehyde from this data. According to the box model results, any discrepancies  
180 between the AMORE 0.25 yield mechanism and the reference mechanism would only show up after 2 days, and only reach significant levels after 3 days. Most of this tail end formaldehyde production is the result of aged, highly oxidized isoprene derived species, which would suggest that other processes such as deposition, condensation, and transport might dominate at this timescale, leading to suppressed production of formaldehyde in the gas phase. Thus, the 0.25 formaldehyde molar yield was chosen for the AMORE v1.2 mechanism used in this work. We made similar adjustments to other VOC species such as  
185 methylglyoxal and glyoxal.

Isoprene derived tetrafunctional compounds, including multifunctional epoxydiols which are similar but distinct from isoprene epoxy-diol, are potentially significant sources of SOA from isoprene (Bates et al). They estimate that IEPOX, organonitrates, and isoprene tetrafunctional compounds all contribute approximately 30% each of isoprene derived SOA. Of  
190 these, isoprene tetrafunctional compounds have the least studied chemistry, resulting in some uncertainty in their SOA yields. A lumped species was added to the AMORE v1.2 isoprene mechanism to represent this group, and an SOA formation pathway was added with the same mechanism as IEPOX, but with a lower SOA yield due to uncertainties in the behavior of these species. The molar yield of this new species was determined by comparison to the set of tetrafunctional compounds represented in the Caltech full isoprene mechanism. The concentration plot comparison is shown in Figure S7.

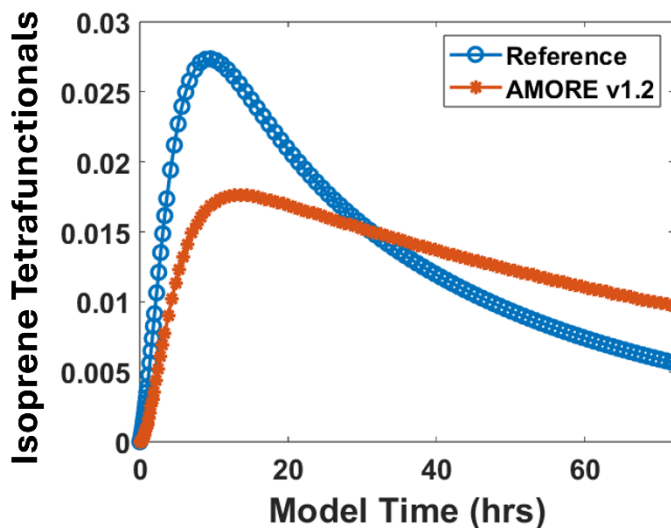

195

Figure S7. This figure shows the concentration of isoprene tetrafunctional compounds for the AMORE v1.2 mechanism and the Caltech reference full isoprene mechanism over a 72-hour F0AM box model run with moderate light conditions, 1 ppb of isoprene, 4e-5 ppb OH, 10 ppb O<sub>3</sub>, 0.005 ppb HO<sub>2</sub>, and 0.05 ppb NO.

200 **Pinene biogenic emissions**

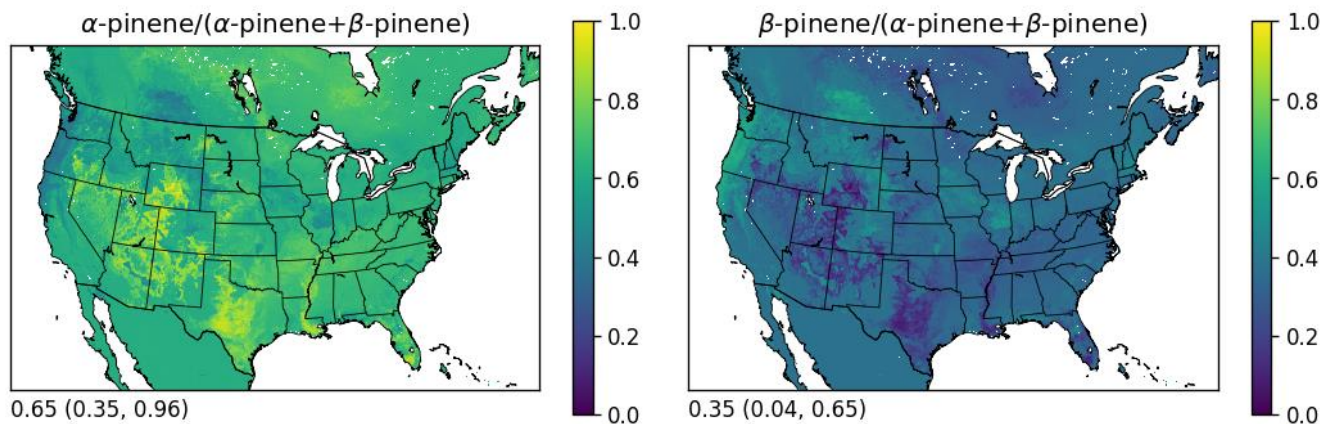

205 **Figure S8.** Ratio of  $\alpha$ -pinene and  $\beta$ -pinene to total pinenes based on the annual sum of biogenic emissions from BEIS. The values for  $\alpha$ -pinene and  $\beta$ -pinene include additional monoterpene emissions from BEIS that would map to these species. Monoterpenes mapped to  $\beta$ -pinene are those that have one double bond which is a terminal double bond and include  $\beta$ -pinene, camphene, and sabinene. Monoterpenes mapped to  $\alpha$ -pinene are all other monoterpenes with one double bond that is not terminal and include  $\alpha$ -pinene,  $\delta$ -3-carene, and  $\alpha$ -thujene. The annotations below each panel show the mean (min, max) over land grid cells.

Additional CMAQ surface concentration plots

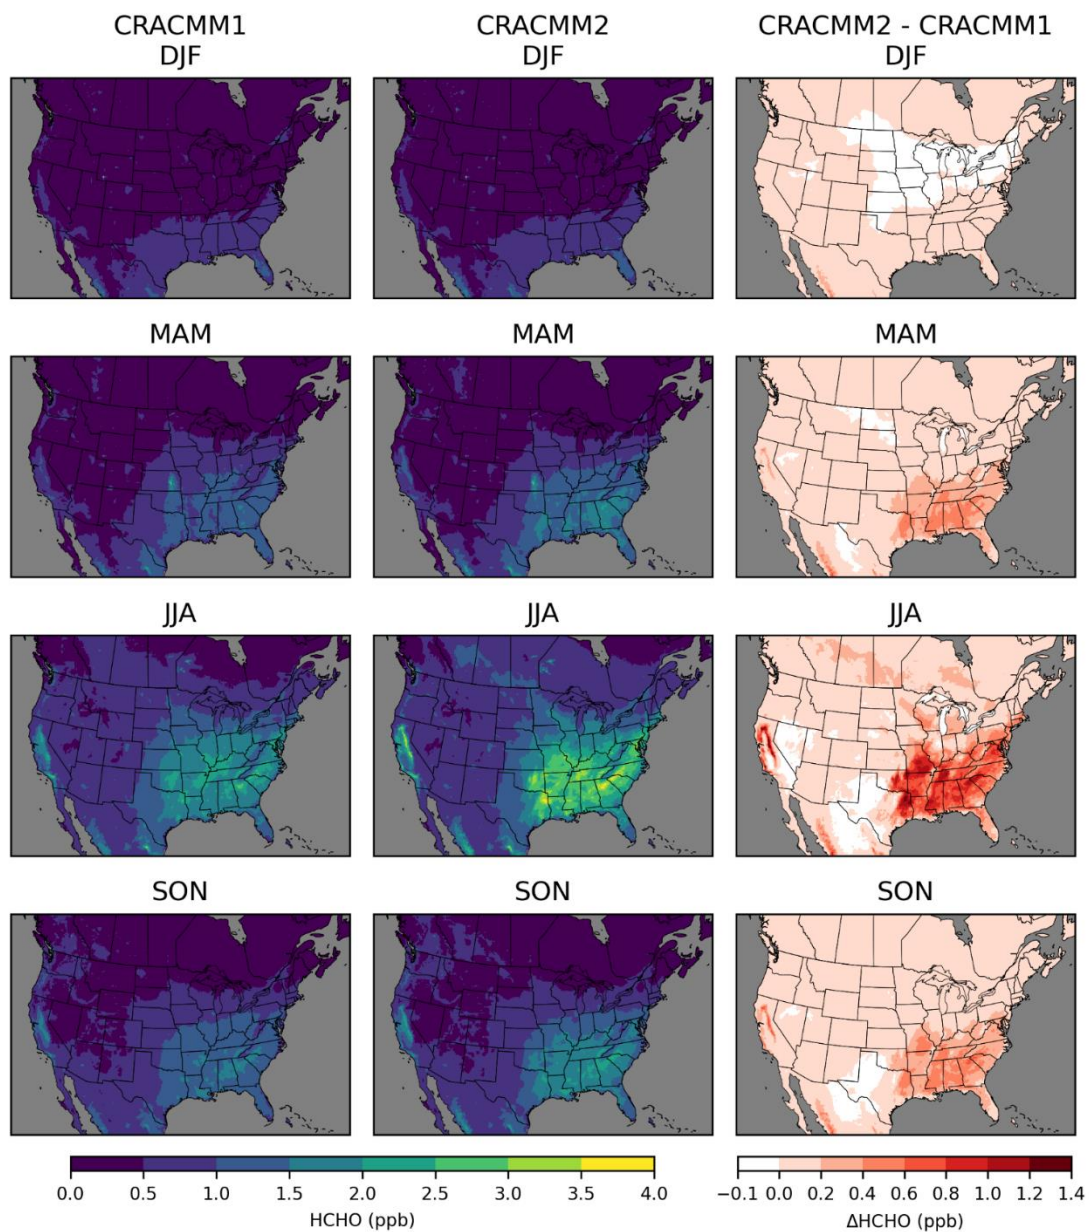

210

**Figure S9. Surface layer 2019 seasonal average HCHO concentrations averaged over 11 am–3 pm local time simulated with CRACMM1 (left column) and CRACMM2 (middle column) and the change in CRACMM2 compared to CRACMM1 (right column).**

215 The effects of adding ECH4 to CRACMM2 are mostly localized in areas with extremely high ECH4 in the emissions inventory (Figure S10). The largest impacts are seen in northeastern Wyoming and around the border between New Mexico

and Colorado. Impacts are also seen in Alberta, Canada, where there is substantial oil and gas activity. Small impacts from ECH<sub>4</sub> can also be seen in the Central Valley of California and in southern California. ECH<sub>4</sub> is small compared to the fixed CMAQ global background methane concentration of 1850 ppb, so we do not expect to see significant effects on HCHO from  
220 ECH<sub>4</sub> other than from extremely large sources. ECH<sub>4</sub> as it is represented in the emissions inventory also does not provide a full accounting of methane emissions. Not all sources of methane are inventoried in the NEI (e.g., waterbodies). Effects of emitted methane will therefore not be captured for the sources that are not traditionally included in the emissions inventory. Impacts on HCHO from adding heterogeneous uptake of HO<sub>2</sub> and nitrate are small and affect mostly the southeastern US. The effect is primarily through the reduction of HO<sub>x</sub> due to HO<sub>2</sub> uptake which decreases the oxidation of isoprene thus  
225 reducing secondary HCHO. The addition of new heterogeneous uptake pathways was not aimed at improving HCHO but were opportunistic updates targeted for implementation in CRACMM2.

The impacts on HCHO from the updates to aromatic chemistry are small and extremely localized compared to some of the other updates. These effects come from the newly added explicit styrene species (STY) in CRACMM2. Most styrene in the  
230 emissions inventory (~55%) comes from non-EGU point sources which are mostly made up of industrial sources. During the typical peak of photochemistry from noon-3pm, the largest impacts are seen in the Los Angeles, California, area and along the border with Mexico near Tijuana. Impacts can also be seen around the Great Lakes region, particularly near Chicago, Illinois, and near the Puget Sound in Washington. More impacted areas can be seen if we look instead at the change in HCHO over all hours rather than focusing only on the peak of photochemistry. The other updates to aromatics do not change  
235 any chemistry. They only involve changes in how emissions are mapped, and these changes have little impact on HCHO. Although the effects on HCHO from the aromatic chemistry updates are relatively small, there is additional value in the addition of two new HAPs, ethylbenzene (EBZ) and styrene (STY), which are now represented explicitly in CRACMM2.

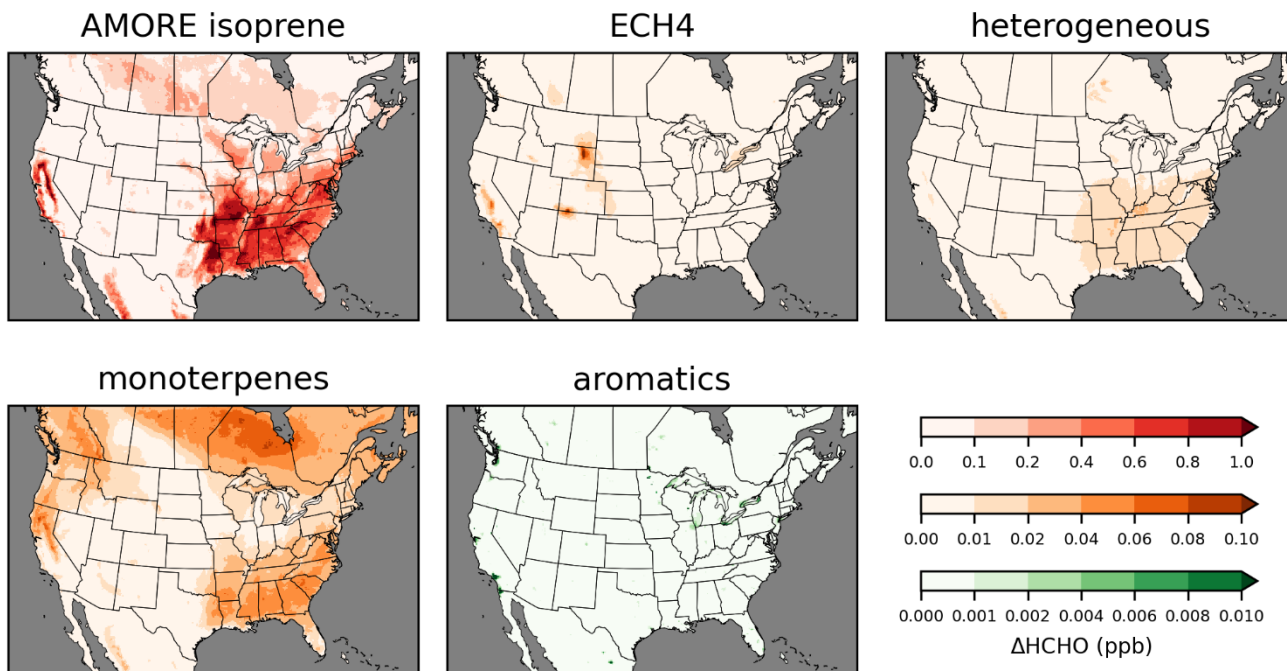

240 **Figure S10. Incremental impacts on surface layer 11 am–3 pm local time 2019 June–August average HCHO concentration**  
 resulting from chemistry updates. Color bar scales for incremental impacts differ depending on the magnitude of the impacts. The  
 red color scale is used for the AMORE isoprene impacts; the orange color scale is used for the ECH4, heterogeneous uptake, and  
 monoterpene impacts; the green color scale is used for aromatic impacts.

245



## Additional TROPOMI results

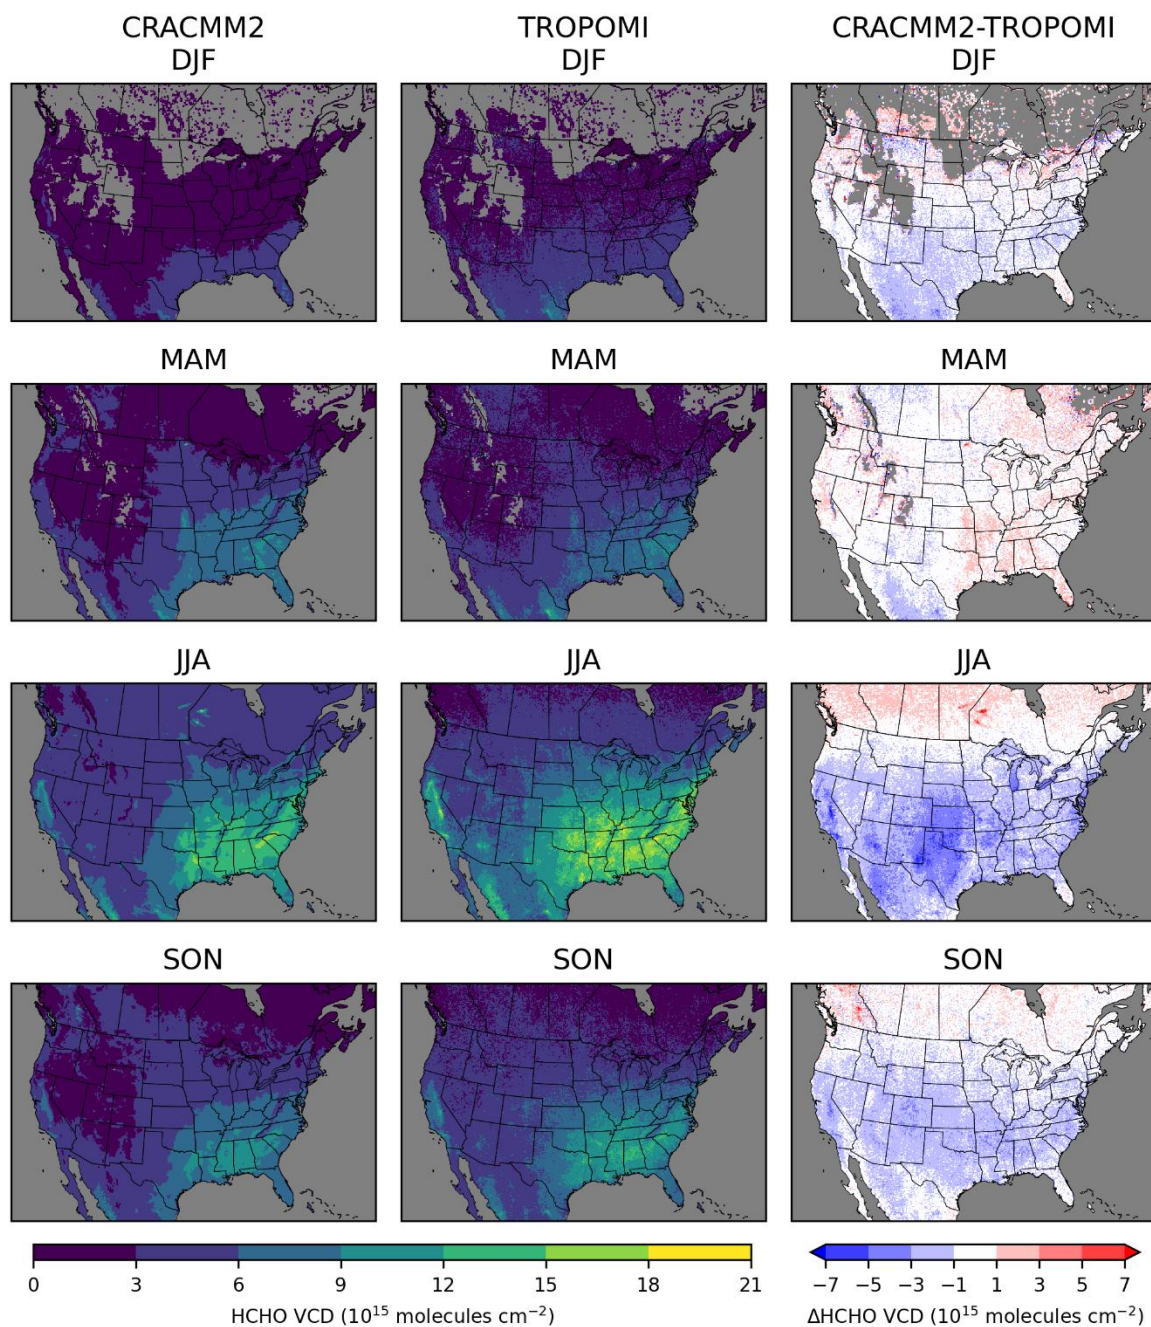

Figure S11. 2019 seasonal average tropospheric vertical column densities from CMAQ with CRACMM2 (left) and from TROPOMI (middle), and the difference between CRACMM2 and TROPOMI (right).

We incorporate an uncertainty estimate into the comparison of HCHO VCD from CMAQ with CRACMM2 to TROPOMI using uncertainty estimates provided in the TROPOMI HCHO algorithm theoretical basis document (ATBD) (KNMI, 2022). Table 13 of the ATBD reports uncertainties in monthly averaged columns for low ( $\leq 1 \times 10^{16}$  molecules  $\text{cm}^{-2}$ ) and elevated ( $> 1 \times 10^{16}$  molecules  $\text{cm}^{-2}$ ) columns as 50% and 25%, respectively, as the total uncertainty neglecting uncertainties in the AMF. We neglect the uncertainties in the AMF since we have incorporated information from the TROPOMI averaging kernel into the CMAQ VCD which is the suggested approach in the ATBD. The uncertainties for low and elevated columns are applied to the June-August 2019 seasonal averages to calculate lower and upper bounds for TROPOMI HCHO VCD which are compared to CRACMM2 along with the original (i.e., without uncertainty estimate) TROPOMI HCHO VCD (Figure S12). The HCHO VCD in CMAQ with CRACMM2 is mostly within the limits of uncertainty of the TROPOMI HCHO VCD. Notable exceptions to this are in the Permian Basin; near Phoenix, Arizona; Los Angeles, California; and other parts of California east of the Central Valley.

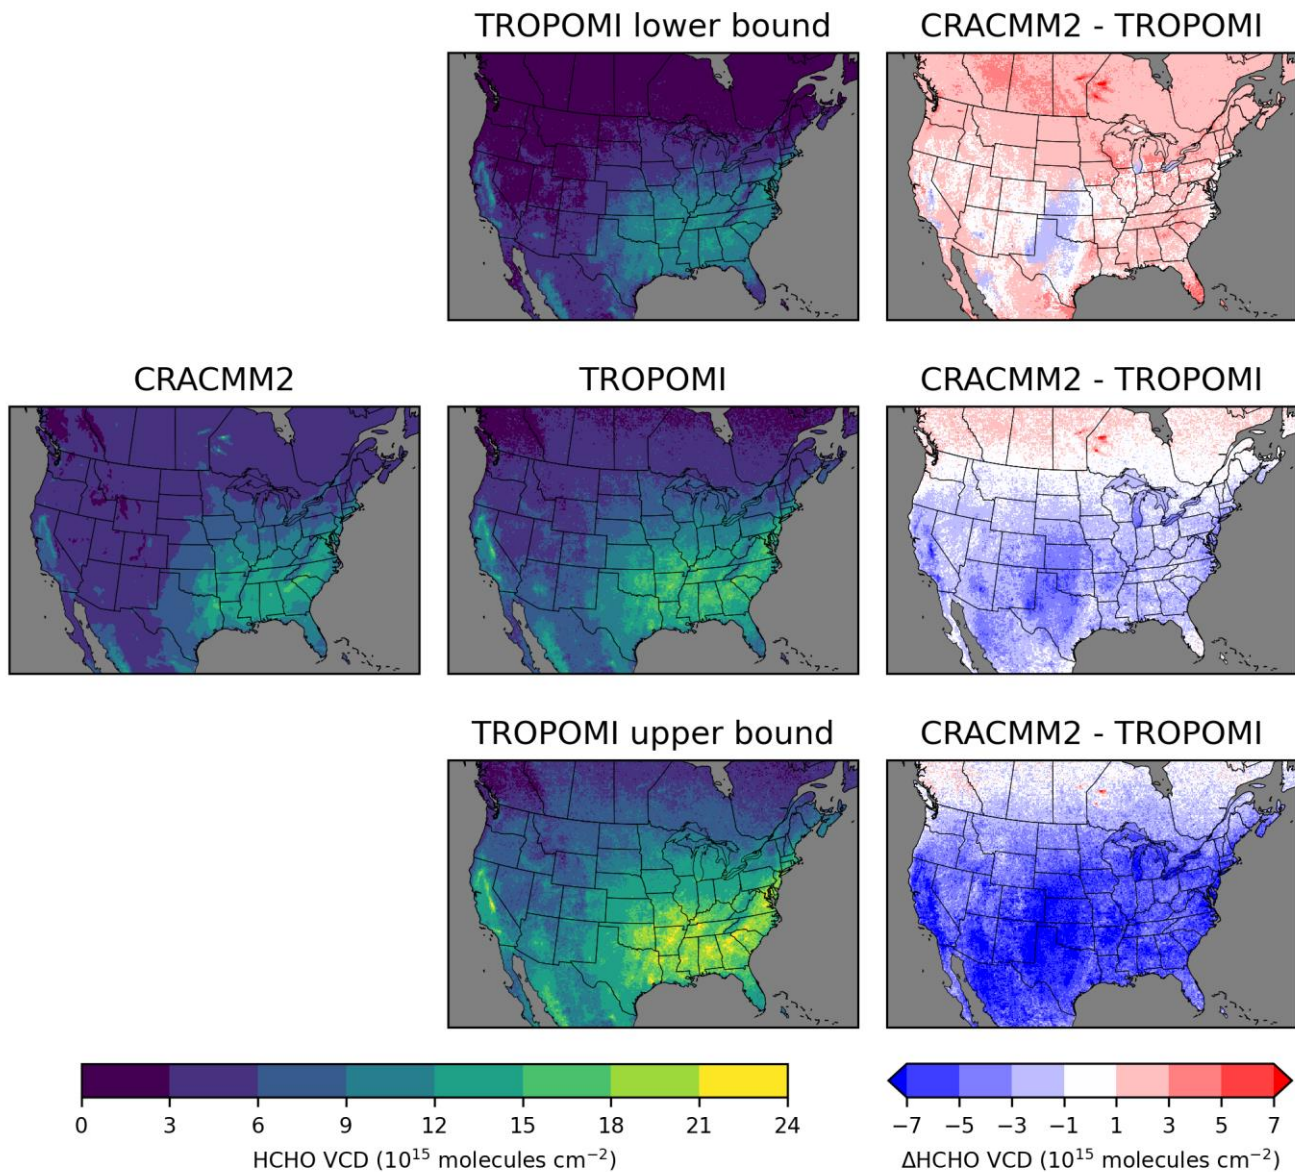

265

**Figure S12. 2019 June-August average tropospheric vertical column densities from CMAQ with CRACMM2 (left column), TROPOMI with CRACMM2-based AMF (middle column), and the difference between CRACMM2 and TROPOMI (right column). The top row uses the lower bound for TROPOMI based on the uncertainty analysis. The middle row does not incorporate uncertainty. The bottom row uses the upper bound for TROPOMI based on the uncertainty analysis.**

270

## Oil and gas emission sensitivity simulation results

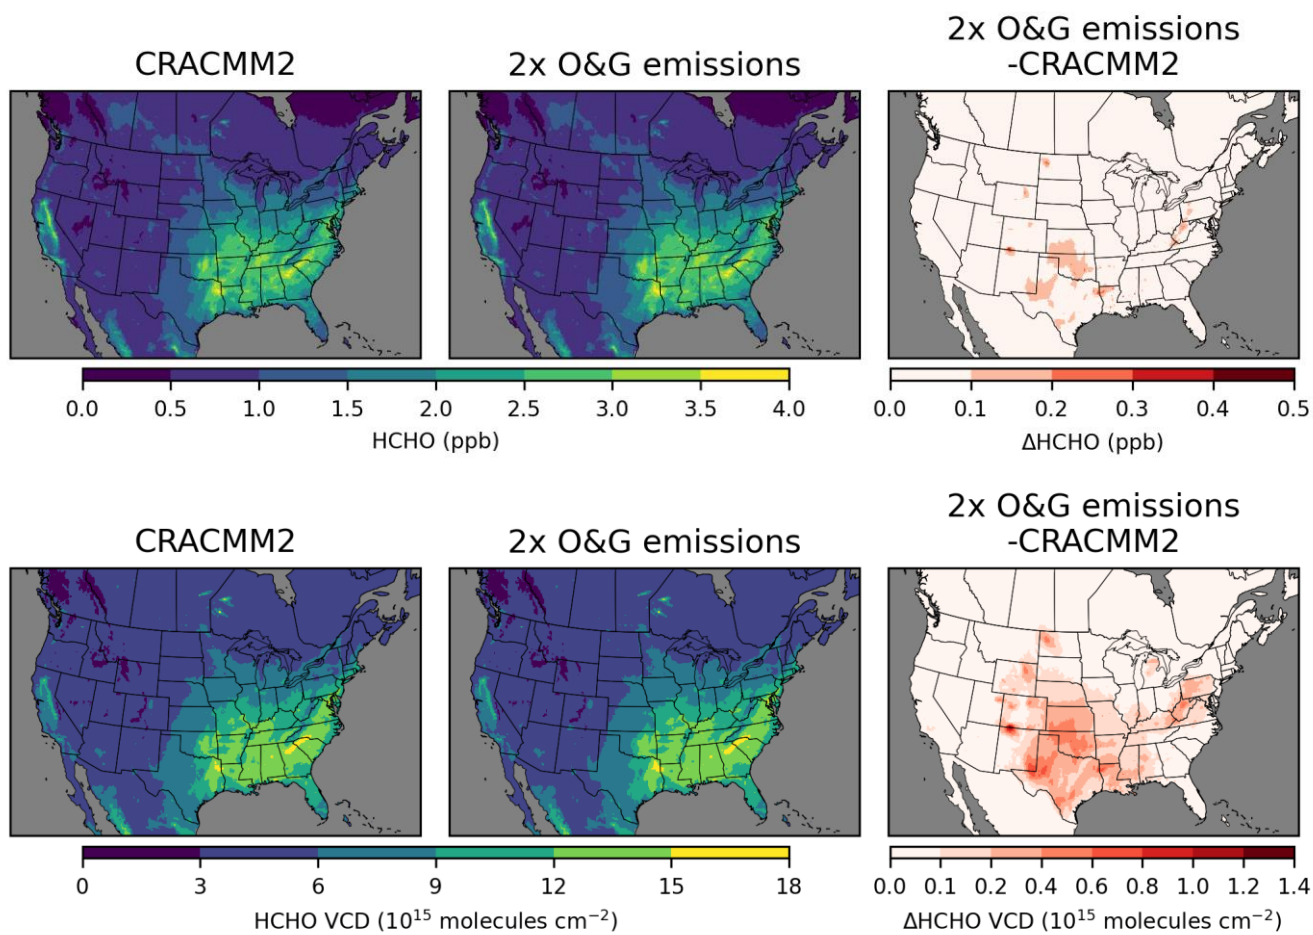

275 **Figure S13.** Average June-August 2019 change in HCHO in CMAQ at the surface from 11am-3pm (top row) and in the vertical column at the TROPOMI overpass time (~1:30pm local solar time) from doubling oil and gas  $\text{NO}_x$  and ROC emissions.

## HCHO AQS evaluation

280 HCHO observations are available from the Air Quality System (AQS) database which contains data from federal, state,  
local, and tribal air quality monitoring stations. Routine HCHO measurements are primarily taken at sites in the  
Photochemical Assessment Monitoring Stations (PAMS) and National Air Toxics Trends Sites (NATTS) networks. HCHO  
is measured using method TO-11A in which HCHO is collected on 2,4-dinitrophenylhydrazine (DNPH) coated cartridges  
from which HCHO derivative products are measured offline using high performance liquid chromatography (HPLC). HCHO  
285 data shown here are obtained from the AQS website ([https://aq5.epa.gov/aqsweb/airdata/download\\_files.html](https://aq5.epa.gov/aqsweb/airdata/download_files.html)) and have not  
been corrected for field blanks; however, the values of field blanks are expected to be small enough that any qualitative  
conclusions are unaffected. PAMS and NATTS sites typically have sample collection schedules of three 8-h samples or one  
24-h sample which limits the usefulness for evaluation of the diurnal variability of HCHO. The DNPH measurement  
technique has also recently been found to measure lower HCHO values compared to other instruments in Atlanta, GA,  
290 (Mouat et al., 2024) and in Salt Lake City, UT, (Jaffe et al., 2024). While there is some uncertainty in these measurements,  
we report a comparison between the daily average HCHO observations available in AQS and daily averages from CMAQ  
using CRACMM1 and CRACMM2 (Figure S14). A total of 5424 daily average observations are available from a total of  
109 sites in 2019. HCHO is underestimated, but the bias is improved by about 15%. There are, however, a limited number of  
sites in the southeastern US (Figure S15) where HCHO in CRACMM2 increased the most which limits the usefulness of the  
295 comparisons to AQS data in evaluating the CRACMM2 updates.

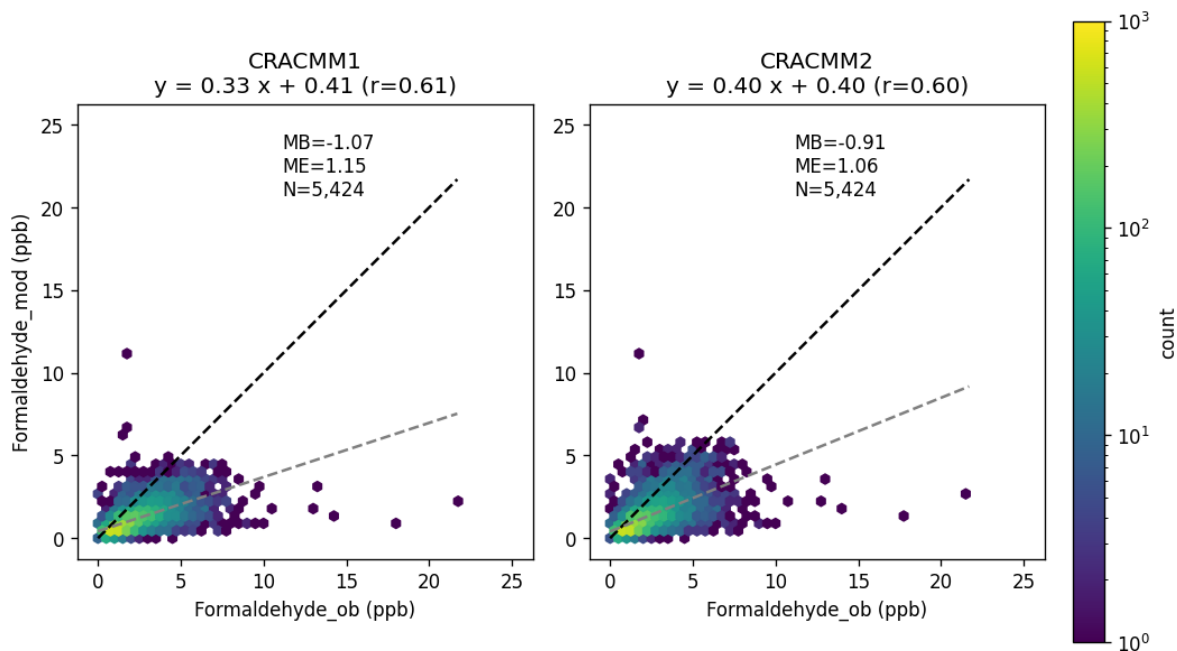

Figure S14. Density scatter plots of daily average HCHO observations from AQS compared to simulated daily averages from CMAQ using CRACMM1 (left) and CRACMM2 (right).

300

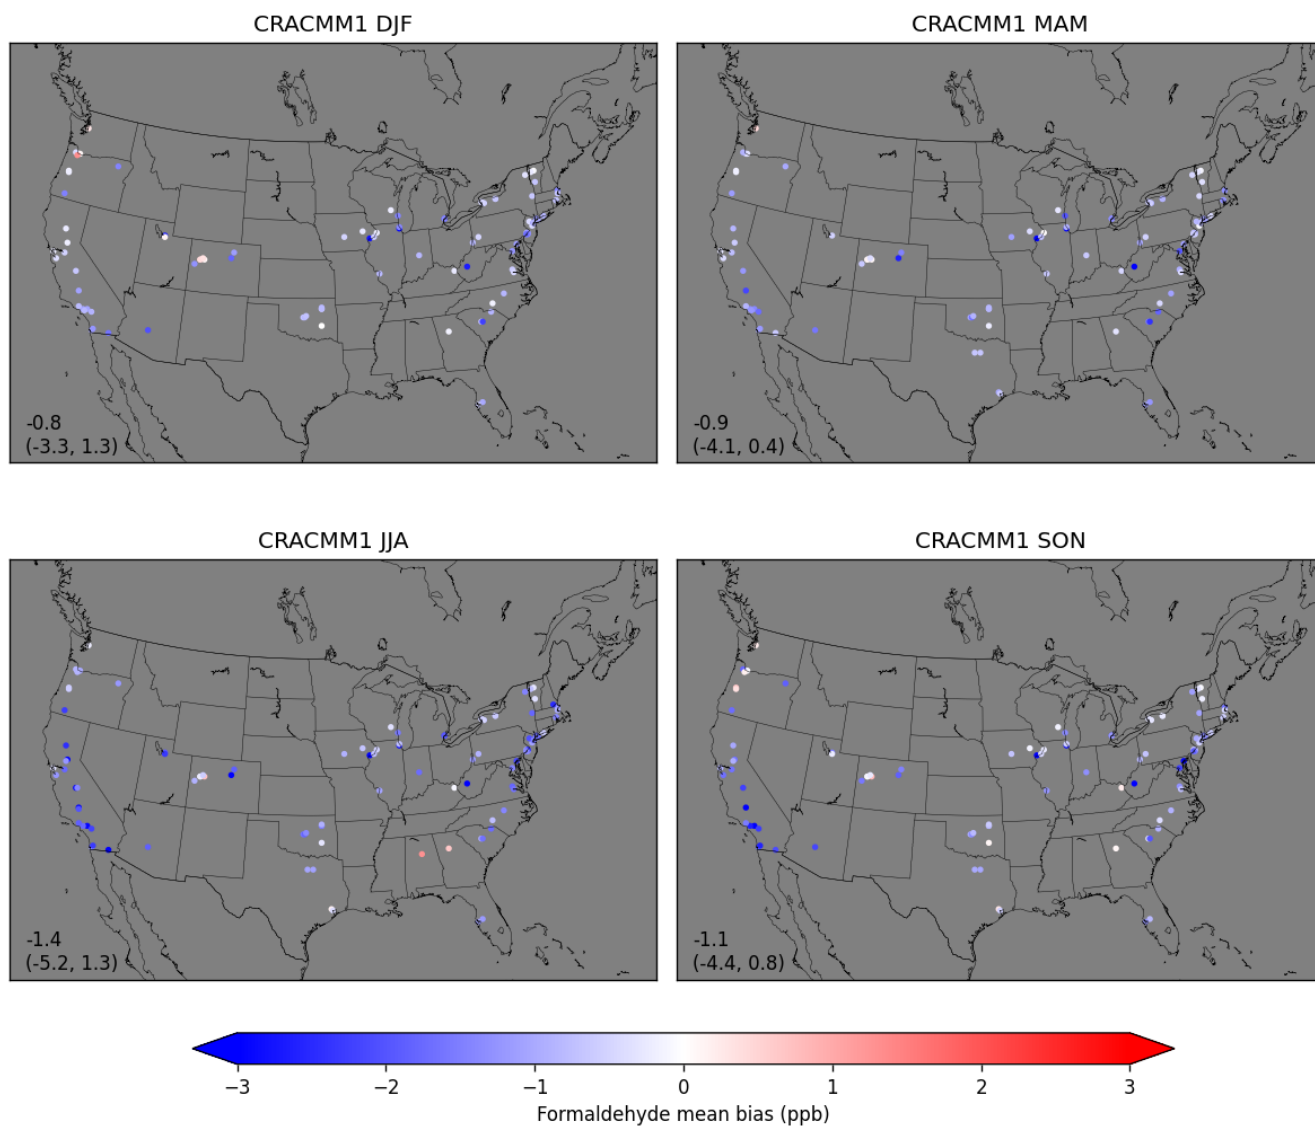

Figure S15. Seasonal average bias in daily average HCHO with CRACMM1 compared to observed HCHO from AQS sites. Annotations in the lower left of each panel show the mean (min, max) of seasonal average biases over all sites.

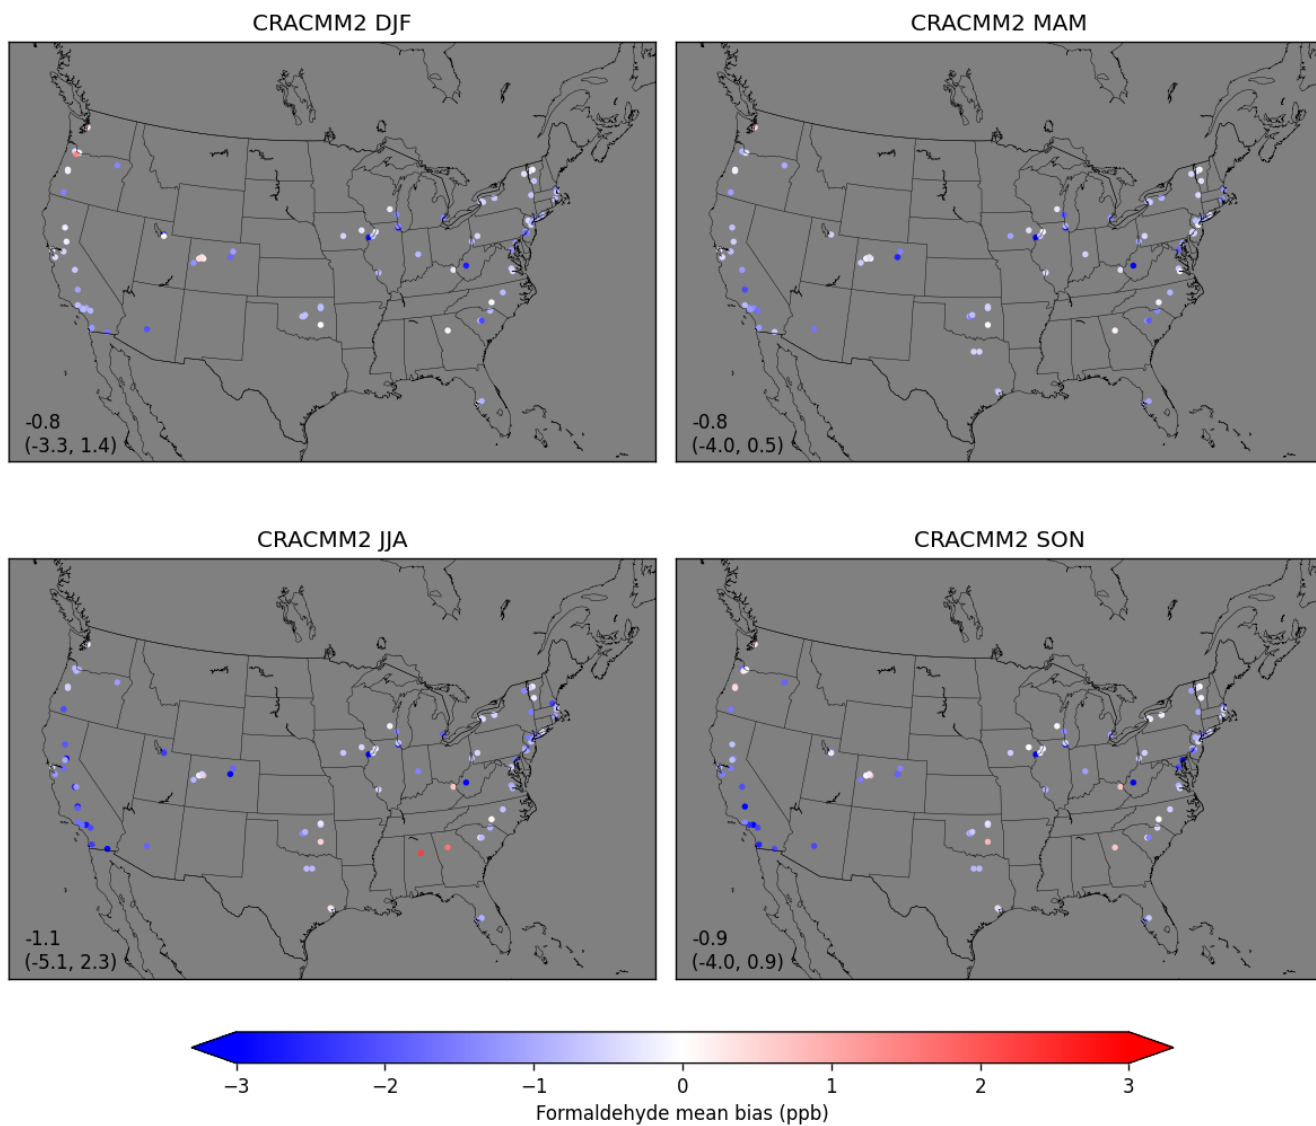

305

**Figure S16. Seasonal average bias in daily average HCHO with CRACMM2 compared to observed HCHO from AQS sites. Annotations in the lower left of each panel show the mean (min, max) of seasonal average biases over all sites.**

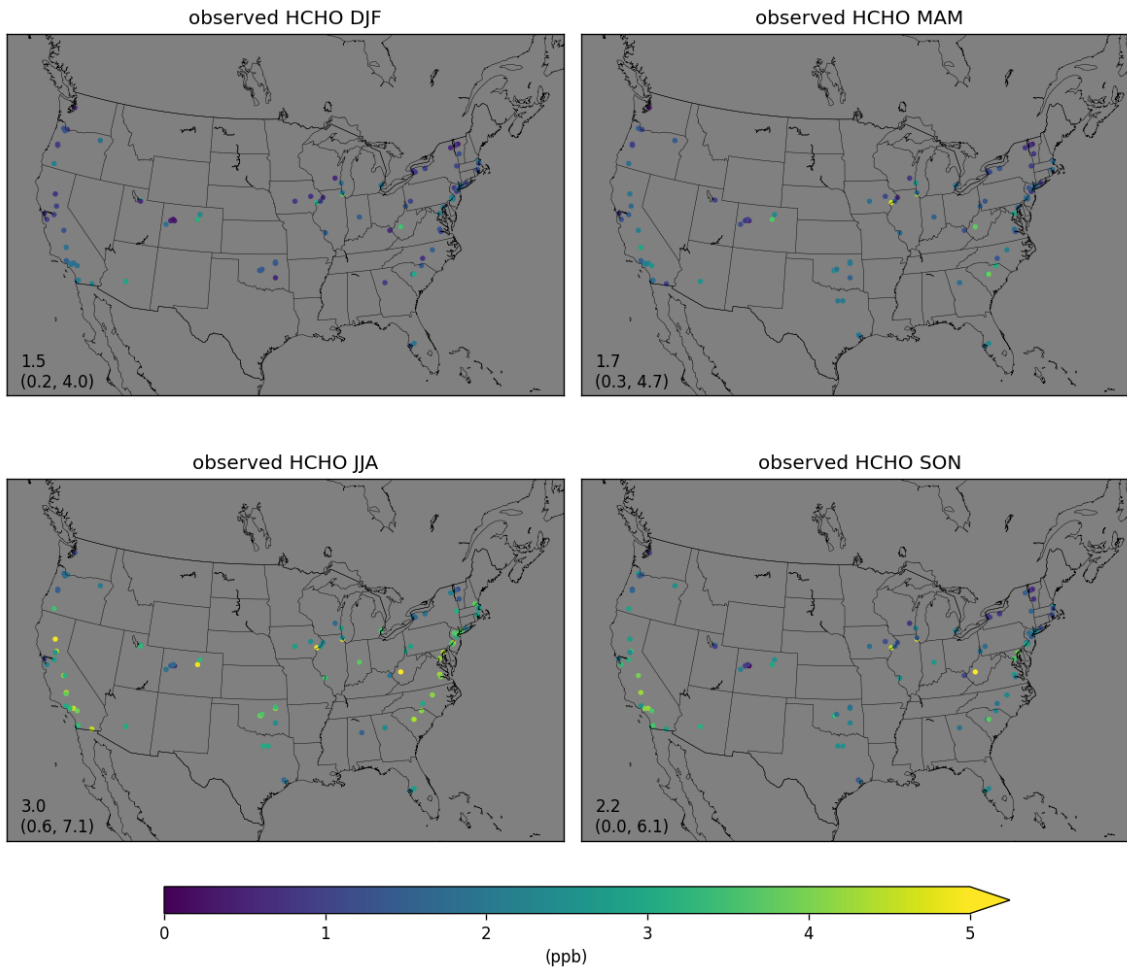

310 **Figure S17.** Seasonal average observed daily average HCHO from AQS sites. Annotations in the lower left of each panel show the mean (min, max) of seasonal average observations over all sites.

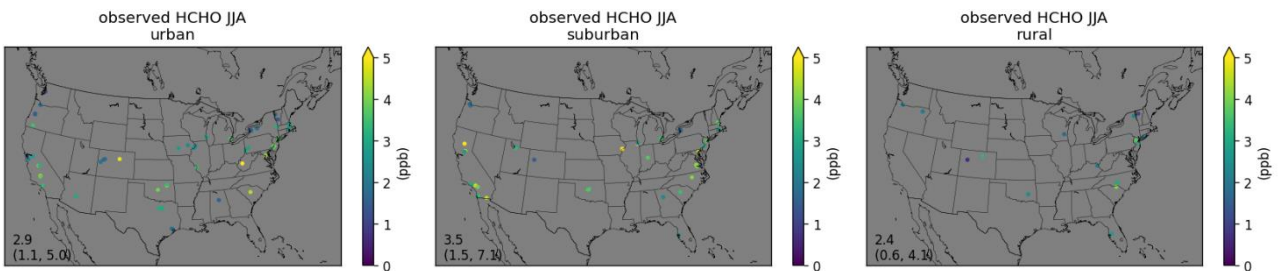

315 **Figure S18.** June-August 2019 average observed daily average HCHO from AQS sites, separated by their location in urban, suburban, and rural areas. Annotations in the lower left of each panel show the mean (min, max) of seasonal average observations over all sites.



## Hourly observations

**Table S4. Hourly HCHO measurement locations, sampling dates, and instrumentation.**

| Location                   | Sampling dates            | Instrument      | Uncertainty               | Additional notes                                                                                                                                                                                                                                                                                                                                                                                            |
|----------------------------|---------------------------|-----------------|---------------------------|-------------------------------------------------------------------------------------------------------------------------------------------------------------------------------------------------------------------------------------------------------------------------------------------------------------------------------------------------------------------------------------------------------------|
| Westport, CT               | 2023 May 22 – Nov 14      | Aerodyne TILDAS | Maximum of 0.6 ppb or 15% | Collected in support of 2023 Synergistic TEMPO Air Quality Science (STAQS). Available from <a href="https://www-air.larc.nasa.gov/cgi-bin/ArcView/listos.2023?GROUND-WESTPORT=1">https://www-air.larc.nasa.gov/cgi-bin/ArcView/listos.2023?GROUND-WESTPORT=1</a>                                                                                                                                            |
|                            | 2018 Jun 21 – Sep 4       | Aerodyne TILDAS | 10%                       | Collected during the 2018 Long Island Sound Tropospheric Ozone Study (LISTOS). Available from <a href="https://www-air.larc.nasa.gov/cgi-bin/ArcView/listos?GROUND-WESTPORT=1">https://www-air.larc.nasa.gov/cgi-bin/ArcView/listos?GROUND-WESTPORT=1</a>                                                                                                                                                   |
| Flax Pond, NY              | 2023 May 22 – Nov 16      | Aerodyne TILDAS | Maximum of 0.6 ppb or 15% | Collected in support of 2023 STAQS. Available from <a href="https://www-air.larc.nasa.gov/cgi-bin/ArcView/listos.2023?GROUND-FLAX-POND=1">https://www-air.larc.nasa.gov/cgi-bin/ArcView/listos.2023?GROUND-FLAX-POND=1</a>                                                                                                                                                                                  |
| New Brunswick, NJ          | 2023 May 22 – Nov 8       | Picarro G2307   | Maximum of 0.6 ppb or 15% | Collected in support of 2023 STAQS. Available from <a href="https://www-air.larc.nasa.gov/cgi-bin/ArcView/listos.2023?GROUND-RUTGERS=1">https://www-air.larc.nasa.gov/cgi-bin/ArcView/listos.2023?GROUND-RUTGERS=1</a>                                                                                                                                                                                      |
| Sheboygan, WI              | 2017 Jun 26 – Jul 22      | Aerodyne TILDAS | 10%                       | Collected during the 2017 Lake Michigan Ozone Study (LMOS). Available from <a href="https://www-air.larc.nasa.gov/cgi-bin/ArcView/lmos?GROUND-SHEBOYGAN=1">https://www-air.larc.nasa.gov/cgi-bin/ArcView/lmos?GROUND-SHEBOYGAN=1</a>                                                                                                                                                                        |
| Salt Lake City, UT         | 2017 Jan 15 – Feb 14      | Aerodyne TILDAS | 10%                       | Collected during the 2017 Utah Winter Fine Particle Study (UWFPS). Available from <a href="https://csl.noaa.gov/groups/csl7/measurements/2017uwf/ps/Ground/DataDownload/index.php?page=/groups/csl7/measurements/2017uwf/ps/Ground/DataDownload/">https://csl.noaa.gov/groups/csl7/measurements/2017uwf/ps/Ground/DataDownload/index.php?page=/groups/csl7/measurements/2017uwf/ps/Ground/DataDownload/</a> |
| Research Triangle Park, NC | 2016 Aug 16 – Dec 11      | Aerodyne TILDAS | 10%                       | Collected near EPA campus                                                                                                                                                                                                                                                                                                                                                                                   |
| Atlanta, GA (South DeKalb) | 2022 Apr 26 – 2023 Oct 31 | Picarro G2307   | 10%                       | See Mouat et al., 2024                                                                                                                                                                                                                                                                                                                                                                                      |
| Atlanta, GA (Georgia Tech) | 2022 Jul 25 – 2023 Jan 31 | MIRA Ultra      | 14% + 0.3 ppb             | See Mouat et al., 2024                                                                                                                                                                                                                                                                                                                                                                                      |

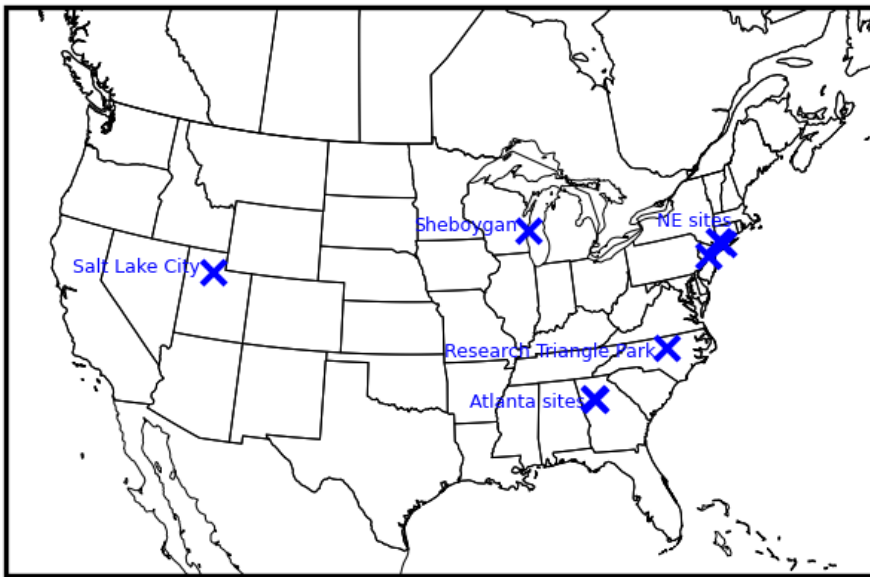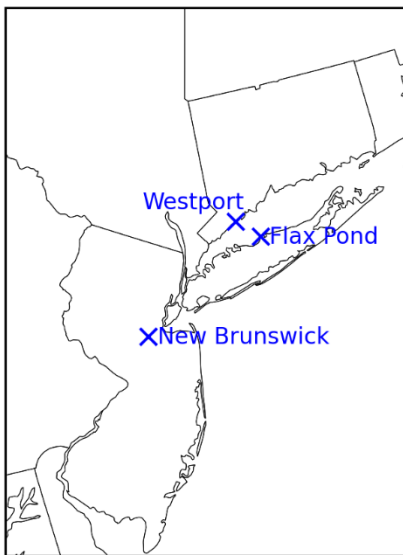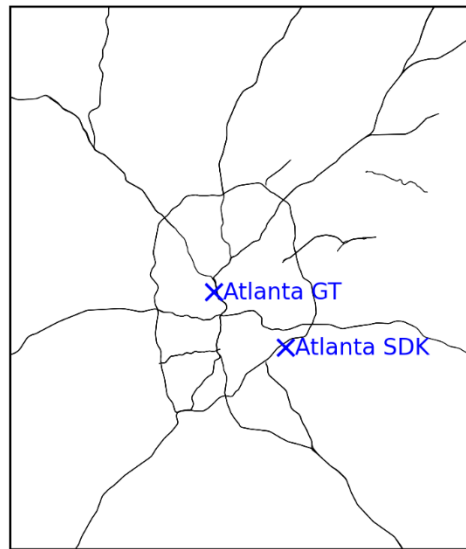

Figure S19. Map of sampling locations listed in Table S4. The two maps in the bottom row show a zoomed in view of the northeastern (NE) US sites and the Atlanta sites. On the map for the Atlanta sites, major roadways are displayed to provide additional geographic context.

325

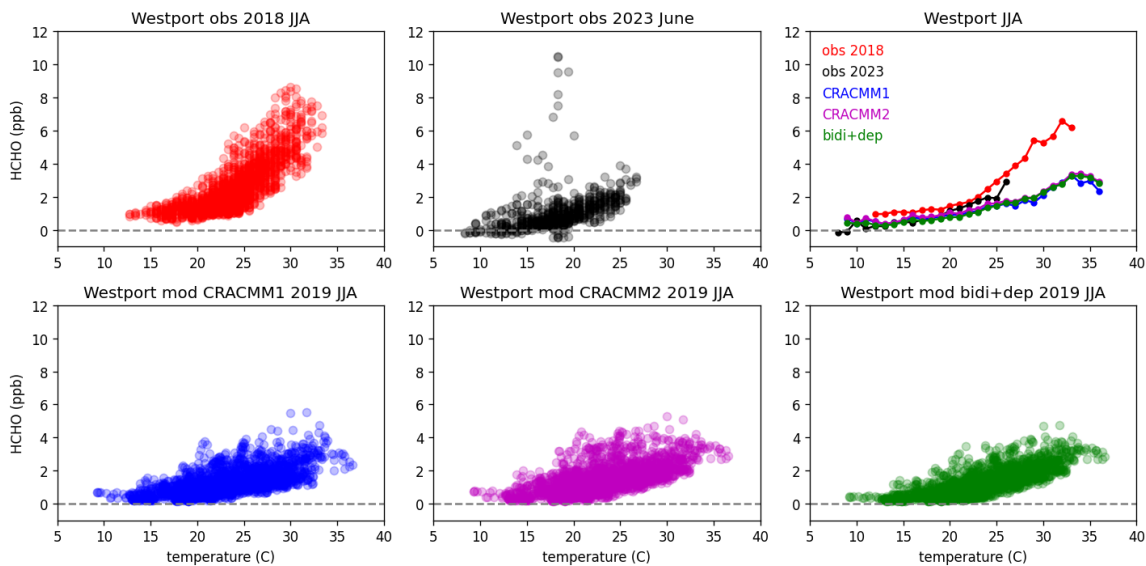

330 **Figure S20.** Hourly HCHO concentration by temperature at the Westport, CT, sampling location during summer. All available hourly data points are provided for the 2018 and 2023 observations and for the CRACMM1, CRACMM2, and bidi+dep CMAQ simulations. The upper right panel shows the median temperature in 1 degree C temperature bins for each set of observations and modeled concentrations.

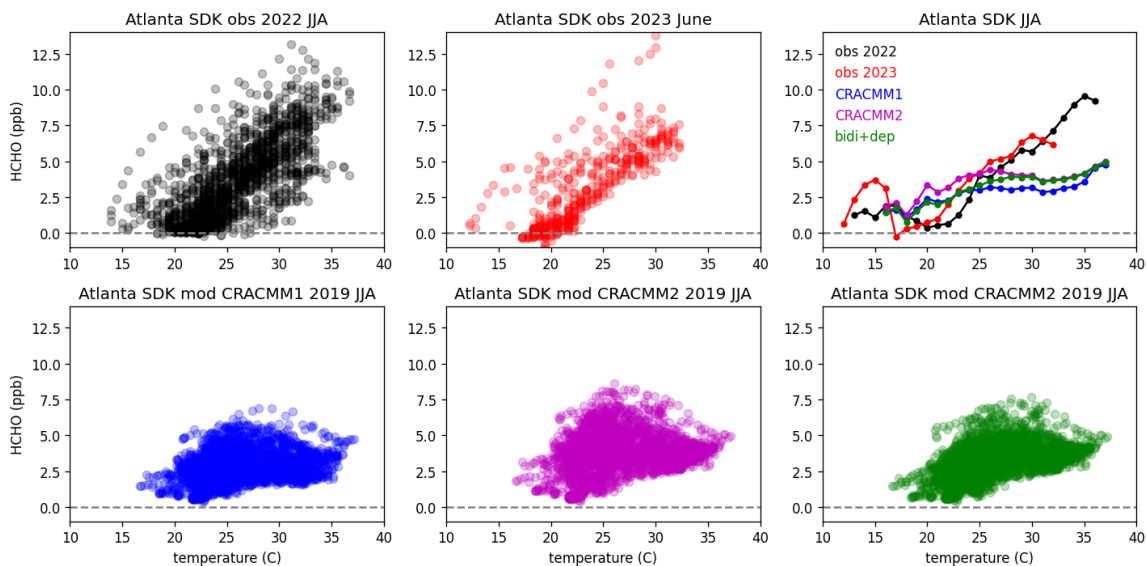

335 **Figure S21.** Hourly HCHO concentration by temperature at the Atlanta, GA South DeKalb (SDK) sampling location during summer. All available hourly data points are provided for the 2022 and 2023 observations and for the CRACMM1, CRACMM2, and bidi+dep CMAQ simulations. The upper right panel shows the median temperature in 1 degree C temperature bins for each set of observations and modeled concentrations.

Observations from fall 2016 in Research Triangle Park, NC, show a rapid rise in the early morning leading to a midday peak which is not captured in the CMAQ simulations. The CRACMM2 updates do increase the HCHO at midday (as well as throughout the entire day) which makes the simulated values closer to the observed at midday but results in higher HCHO at night. The diurnal profile of the CMAQ simulations is much flatter than is seen in the observations. The other observations included in Figure S22 are during summer. For the Sheboygan, WI, data the diurnal profile is mostly flat with small late morning and evening peaks. The peak values simulated with CRACMM2 are close to those seen in the observations, despite the shape of the diurnal profile not aligning well with the observations. We note also that this sampling location is on the shore of Lake Michigan which has complex land-sea breeze effects which are not always well simulated, so meteorology could play an important role here. The observations for Westport, CT, during 2018 are similar to the 2023 observations at the same site with HCHO beginning to rise in the early morning, peaking around noon, and then falling as the afternoon progresses and into night. The major difference between the 2018 and 2023 data is the higher midday peak in the 2018 observations. The CMAQ data shown for Westport, CT, below are identical to what is shown in Figure 6 for the Westport 2023 data.

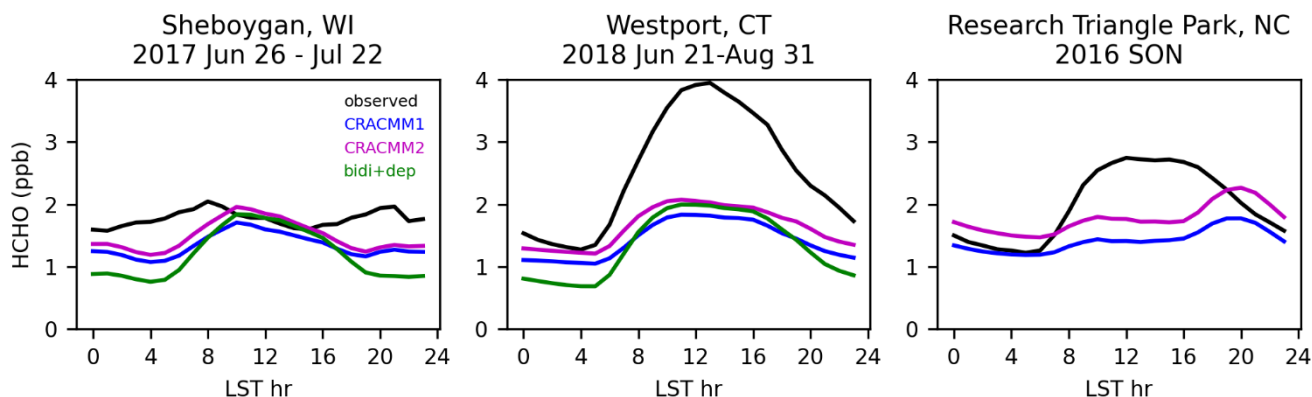

355 **Figure S22. Diurnal profiles of observations in several years at several sites compared to CMAQ simulations in 2019 using CRACMM1, CRACMM2, and CRACMM2 with updated HCHO bidirectional flux and deposition (bidi+dep). The bidi+dep results are not shown for the Research Triangle Park, NC, site since this was a sensitivity simulation conducted for summer only. Sampling locations and dates are provided above each panel.**

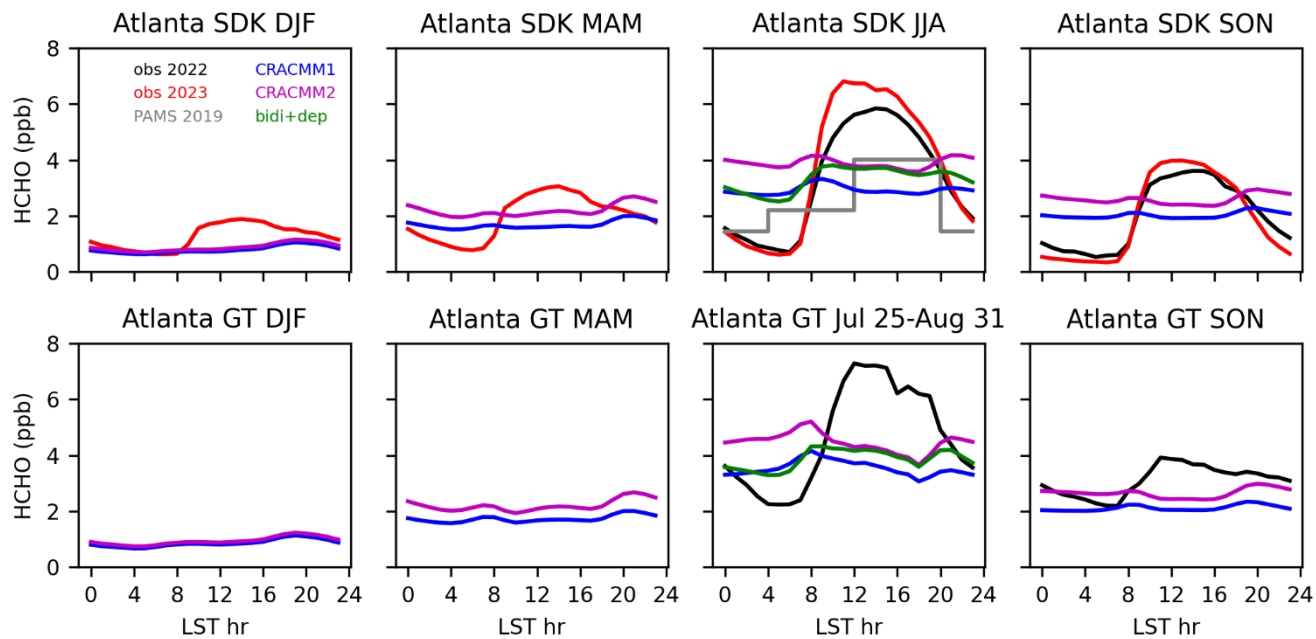

360 **Figure S23. Seasonal average diurnal variability at South DeKalb (SDK) and Georgia Tech (GT) sites.**

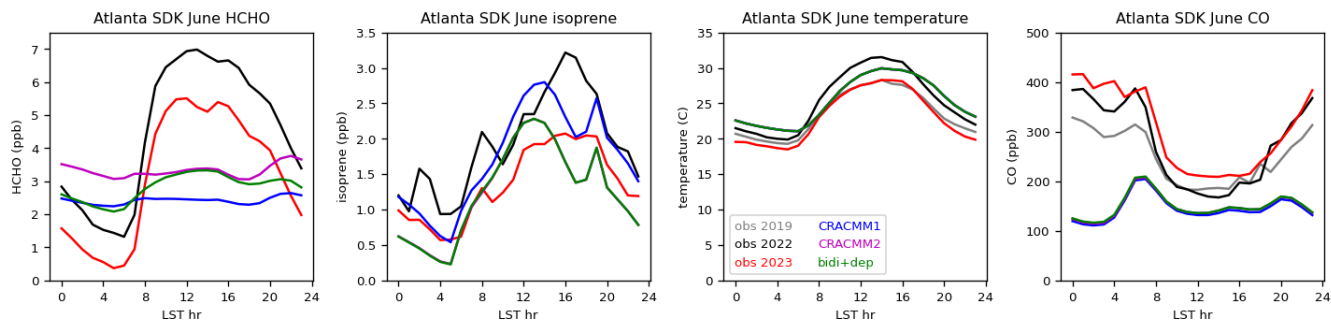

**Figure S24. Hourly HCHO, isoprene, temperature, and CO during June for various years at Atlanta SDK PAMS site.**

365

## Effects of HCHO bidirectional flux and deposition updates

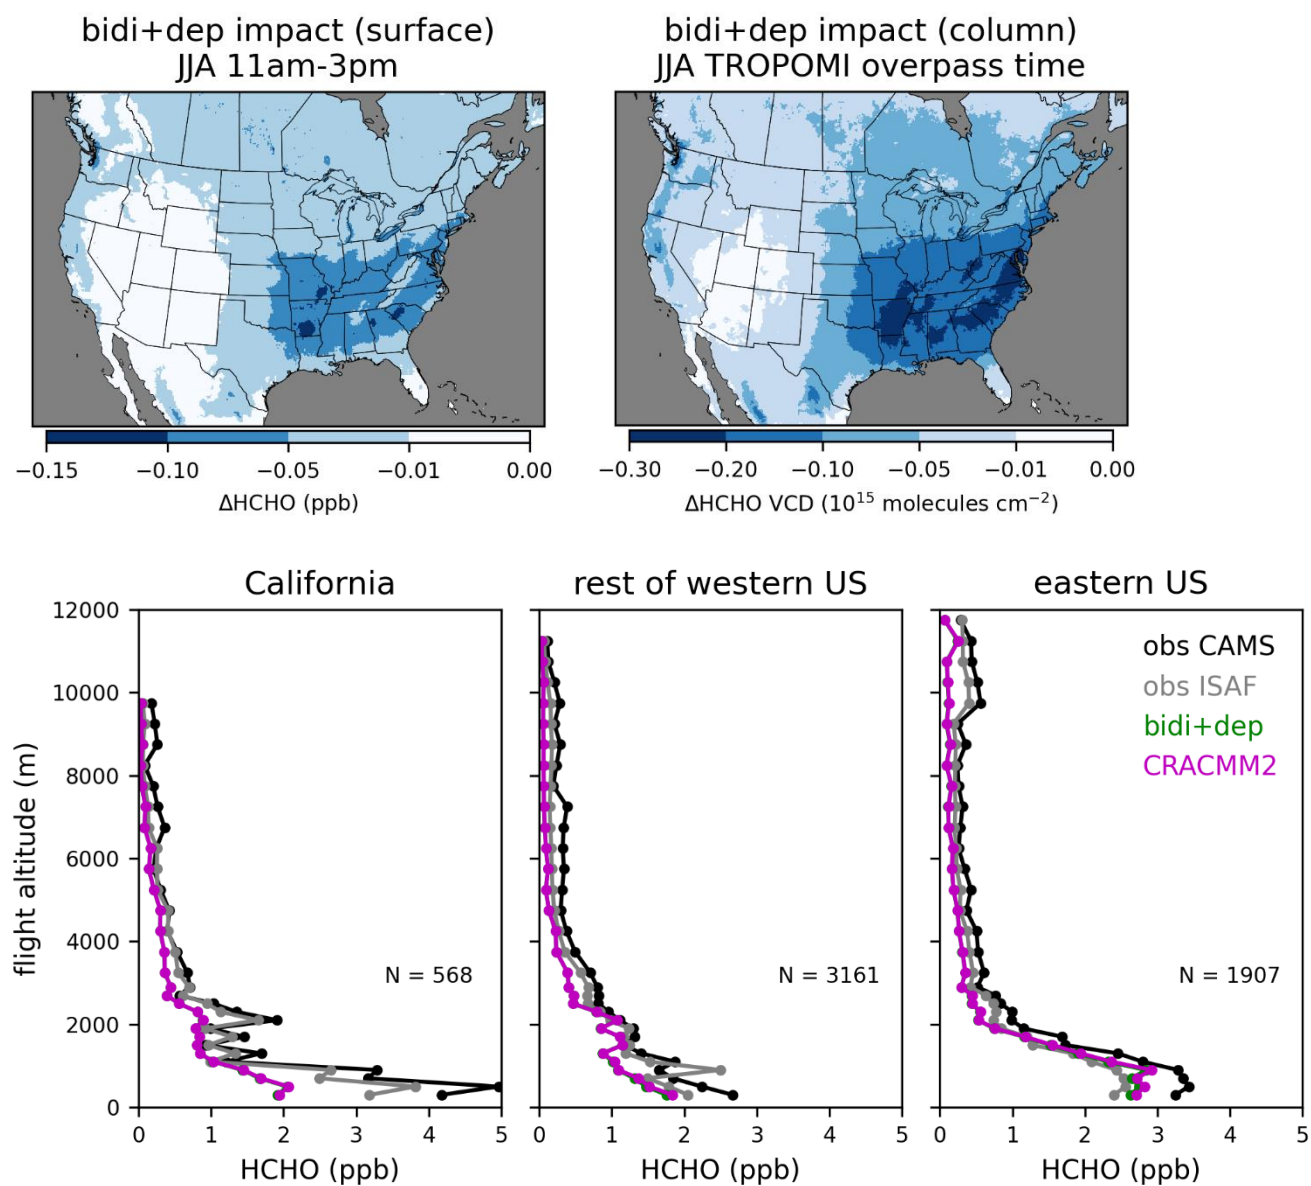

370

Figure S25. Effects of bidirectional flux and deposition updates on HCHO for 2019 June-August 11am-3pm surface HCHO (top left), 2019 June-August average HCHO VCD at the TROPOMI overpass time (top right), and on the HCHO vertical profile comparison to FIREX (bottom).

375

## Seasonal average HCHO controllable fractions

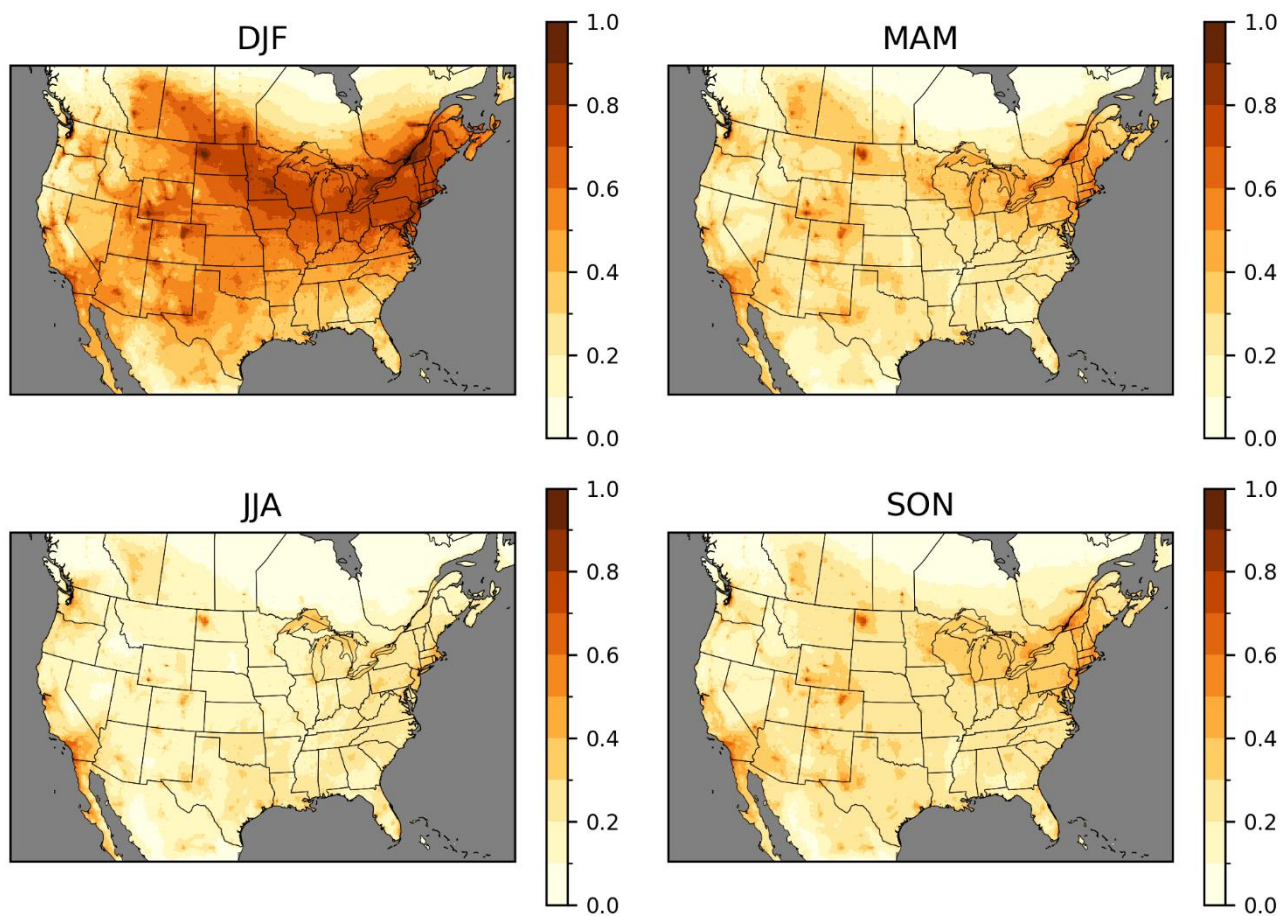

**Figure S26. Seasonal average controllable fraction of HCHO calculated as the difference between the base simulation and the zero US anthropogenic NO<sub>x</sub> and ROC simulation divided by the base simulation.**

## CRACMM2 ozone evaluation

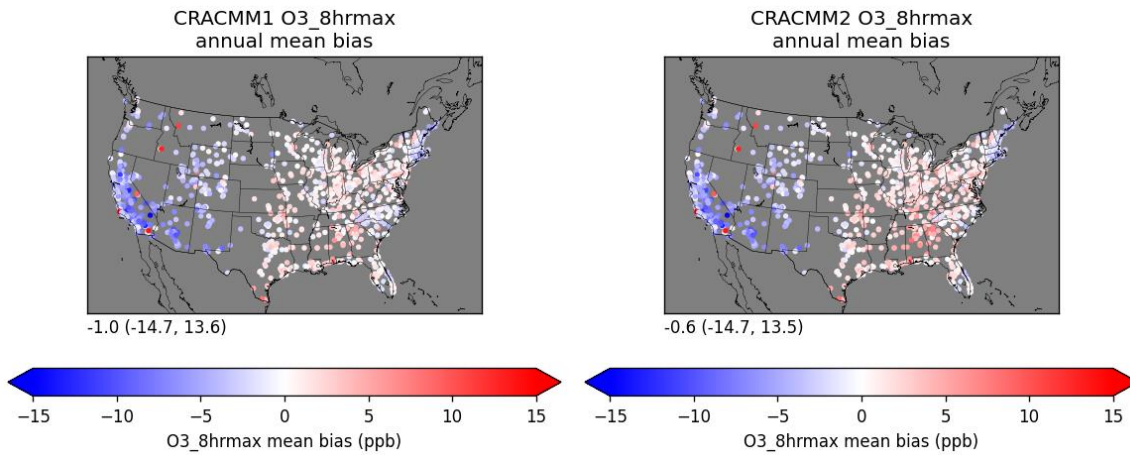

**Figure S27.** Annual mean bias in MDA8 O<sub>3</sub> for 2019 at AQS monitoring sites for CRACMM1 (left) and CRACMM2 (right). The annotations in the lower left show the mean (min, max) site average biases.

385

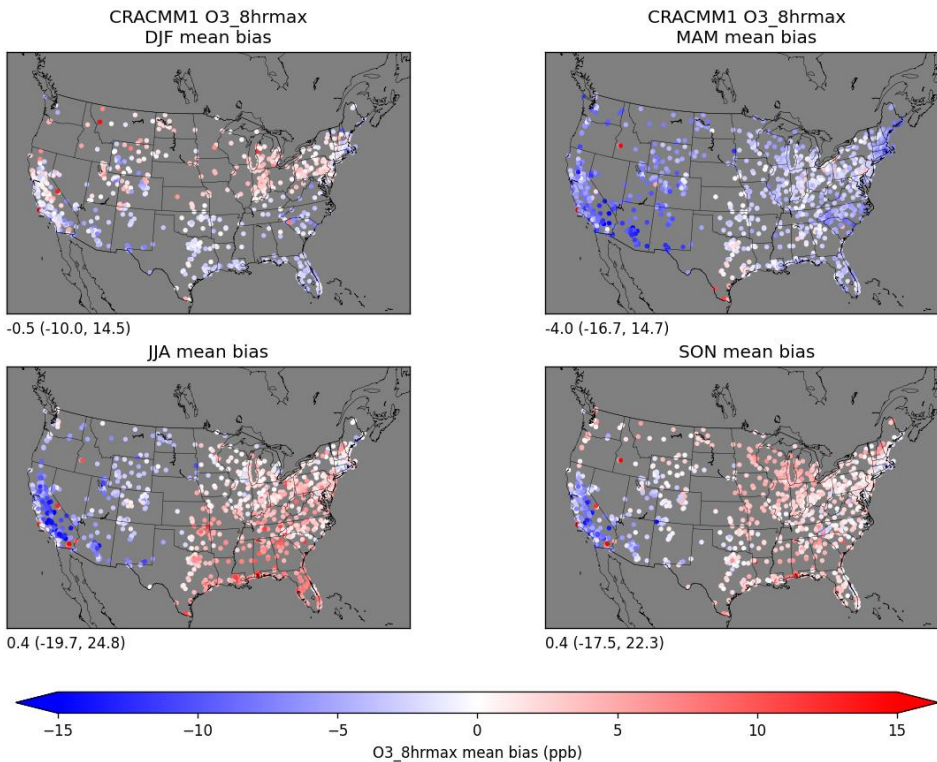

**Figure S28.** Seasonal mean bias in MDA8 O<sub>3</sub> for 2019 at AQS monitoring sites for CRACMM1. The annotations in the lower left show the mean (min, max) site average biases.



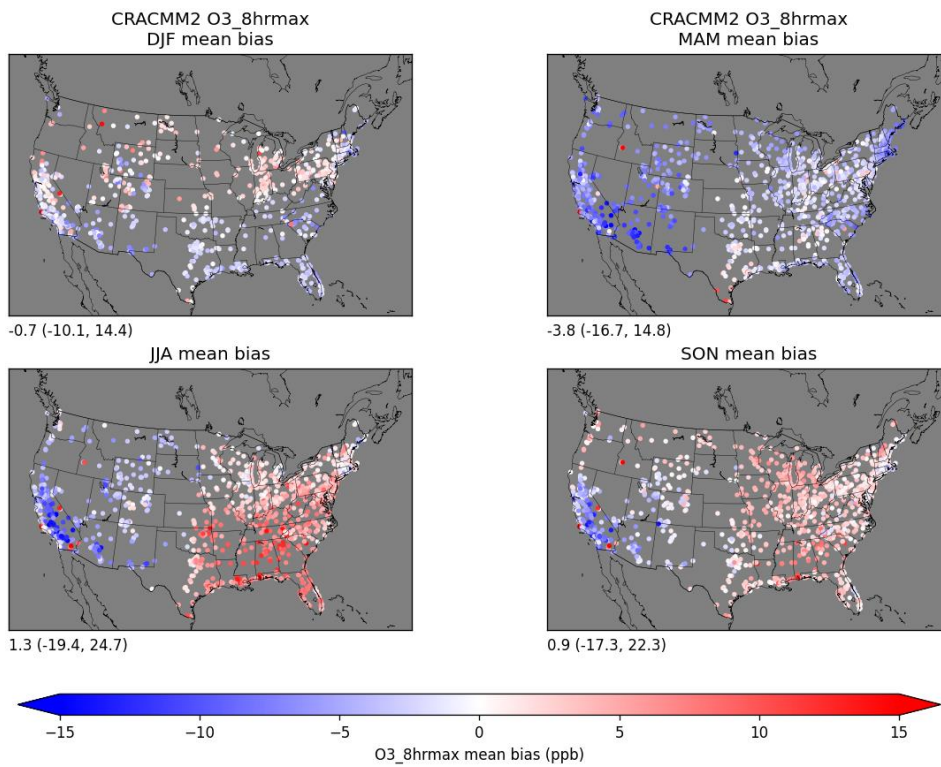

390

**Figure S29. Seasonal mean bias in MDA8 O<sub>3</sub> for 2019 at AQS monitoring sites for CRACMM2. The annotations in the lower left show the mean (min, max) site average biases.**

395

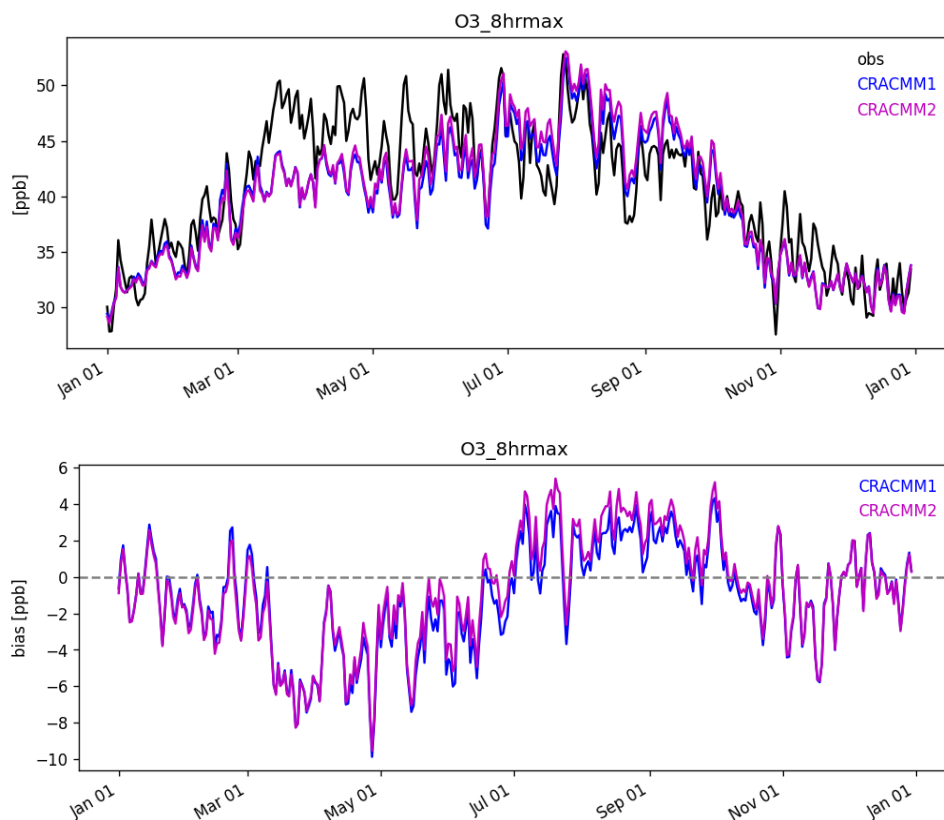

**Figure S30.** Daily average MDA8 O<sub>3</sub> (top) and bias (bottom) for 2019 averaged over all AQS monitoring sites for CRACMM1 and CRACMM2.

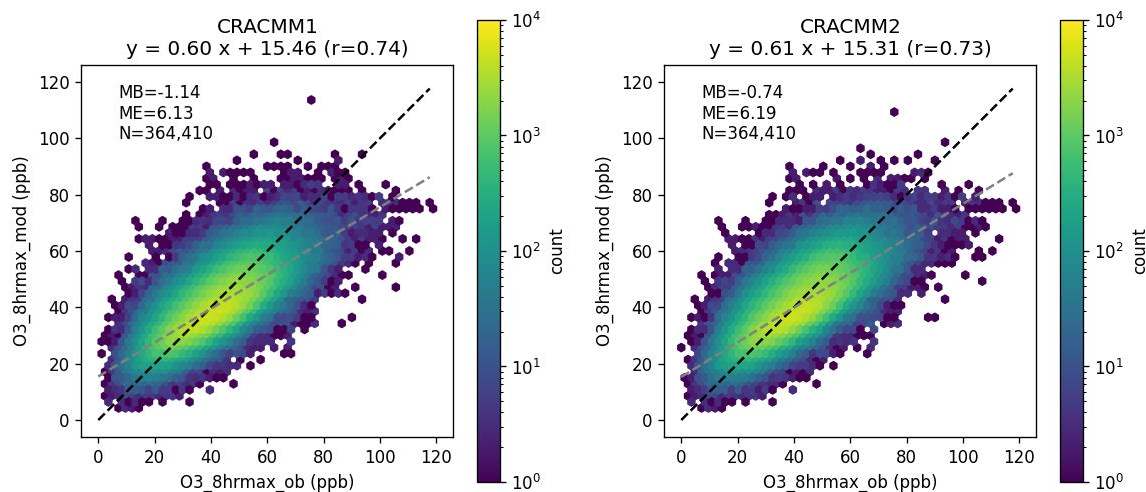

400

**Figure S31.** Density scatter plot of observed MDA8 O<sub>3</sub> vs. CRACMM1 (left) and CRACMM2 (right). The mean bias (MB), mean error (ME), and number of observations (N) are indicated on each panel.

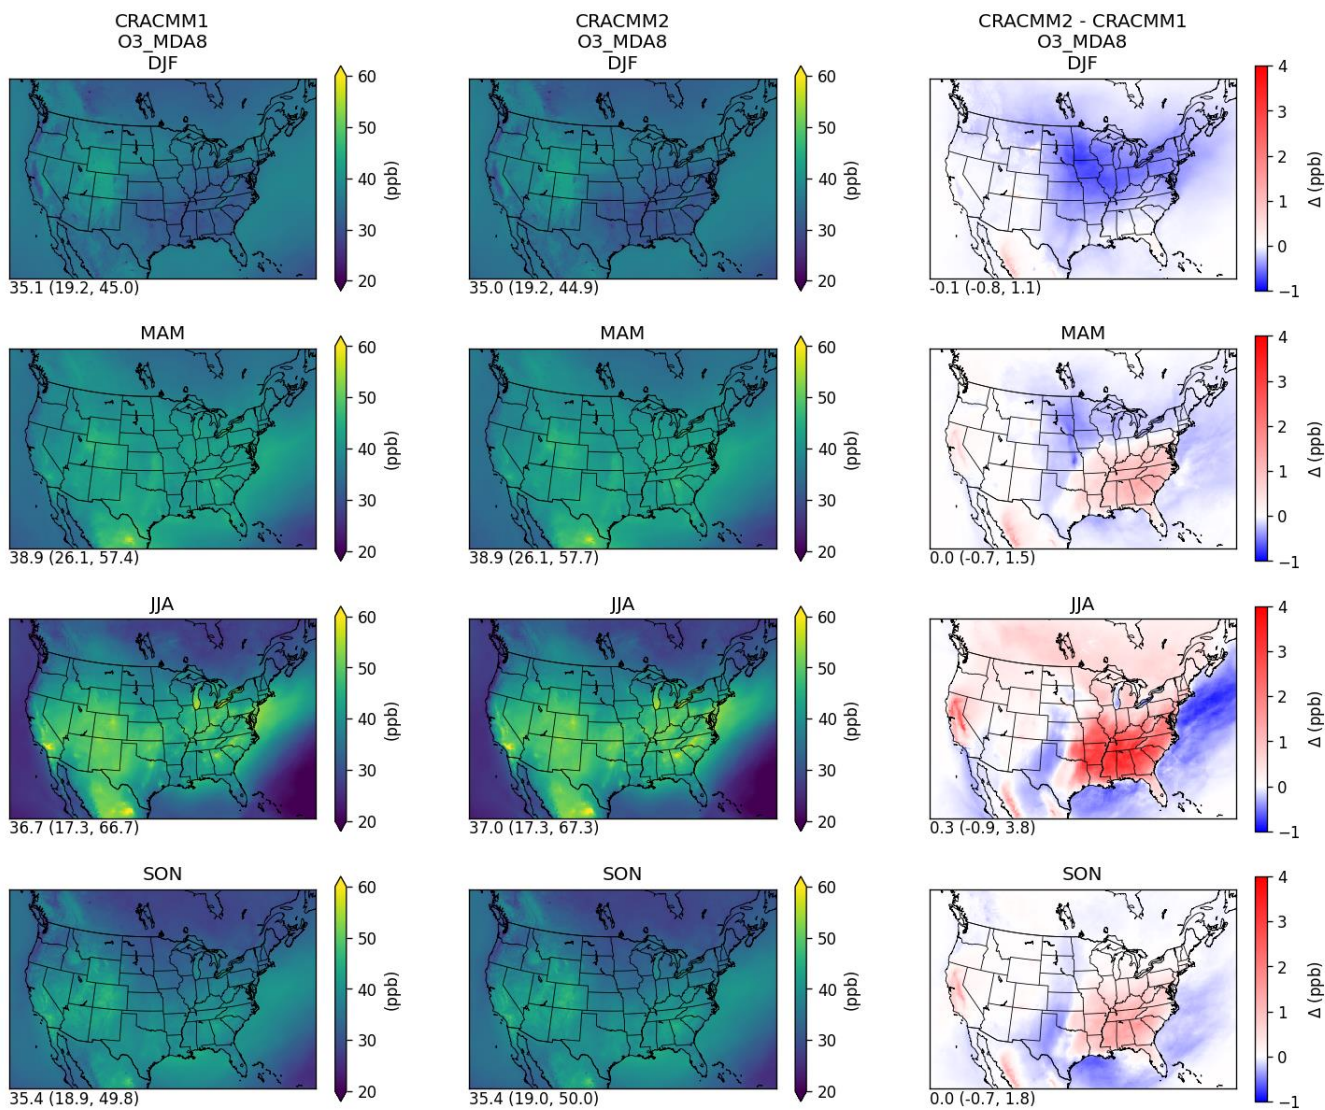

405 **Figure S32. Seasonal average MDA8 O<sub>3</sub> in CRACMM1 (left column) and CRACMM2 (middle column) and the change in CRACMM2 compared to CRACMM1 (right column). The annotations in the lower left show the mean (min, max) over the modeling domain.**

410

## CRACMM2 PM2.5 evaluation

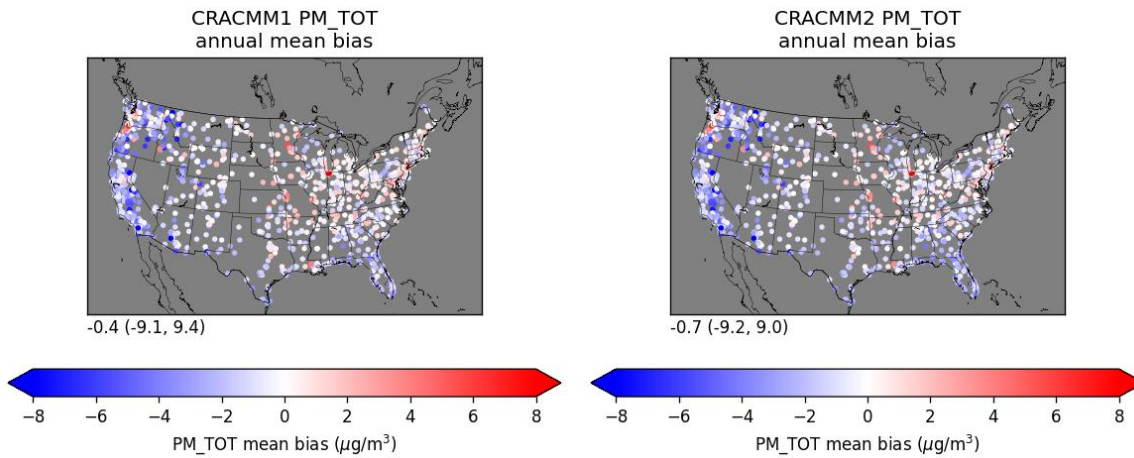

415 **Figure S33. Annual mean bias in daily average PM<sub>2.5</sub> for 2019 at AQS monitoring sites for CRACMM1 (left) and CRACMM2 (right). The annotations in the lower left show the mean (min, max) site average biases.**

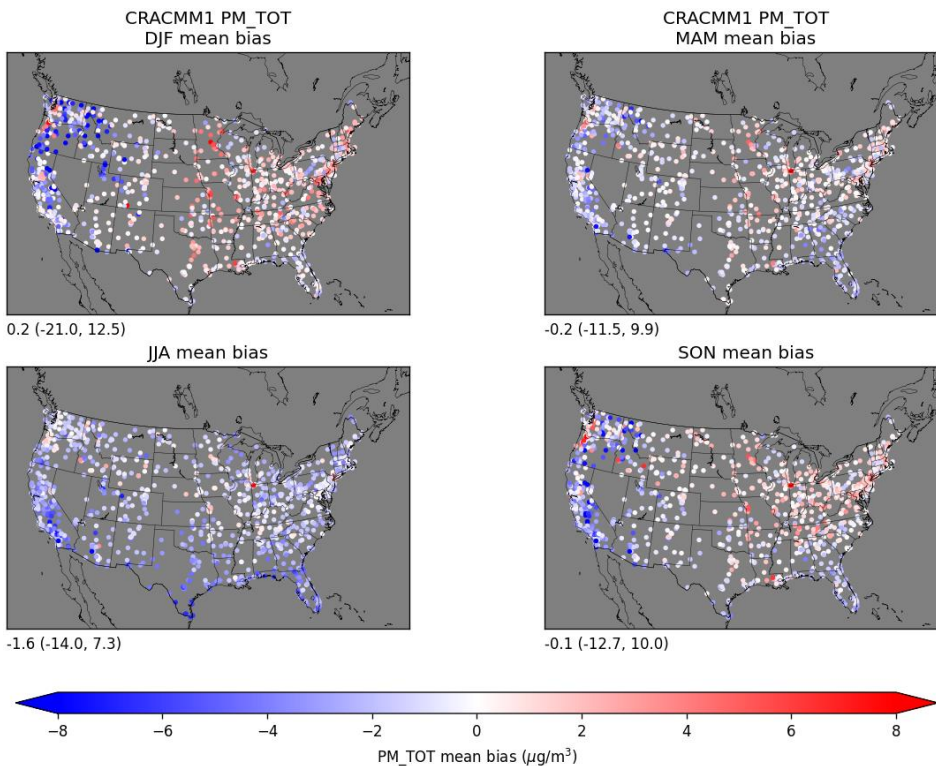

**Figure S34. Seasonal mean bias in daily average PM<sub>2.5</sub> for 2019 at AQS monitoring sites for CRACMM1. The annotations in the lower left show the mean (min, max) site average biases.**

420

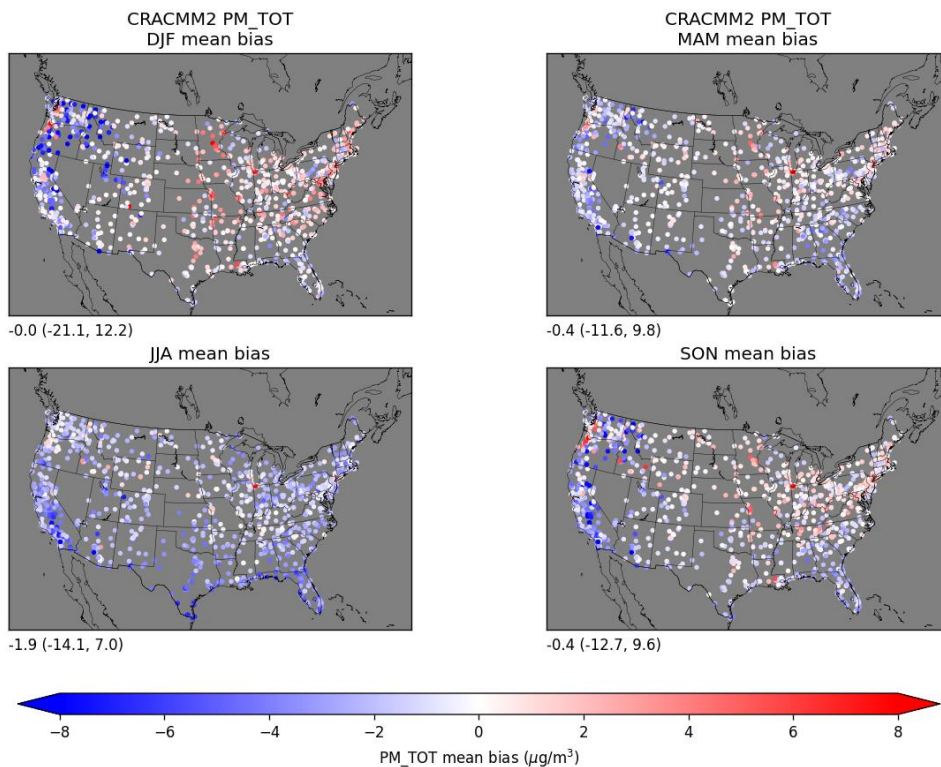

**Figure S35. Seasonal mean bias in daily average  $\text{PM}_{2.5}$  for 2019 at AQS monitoring sites for CRACMM2. The annotations in the lower left show the mean (min, max) site average biases.**

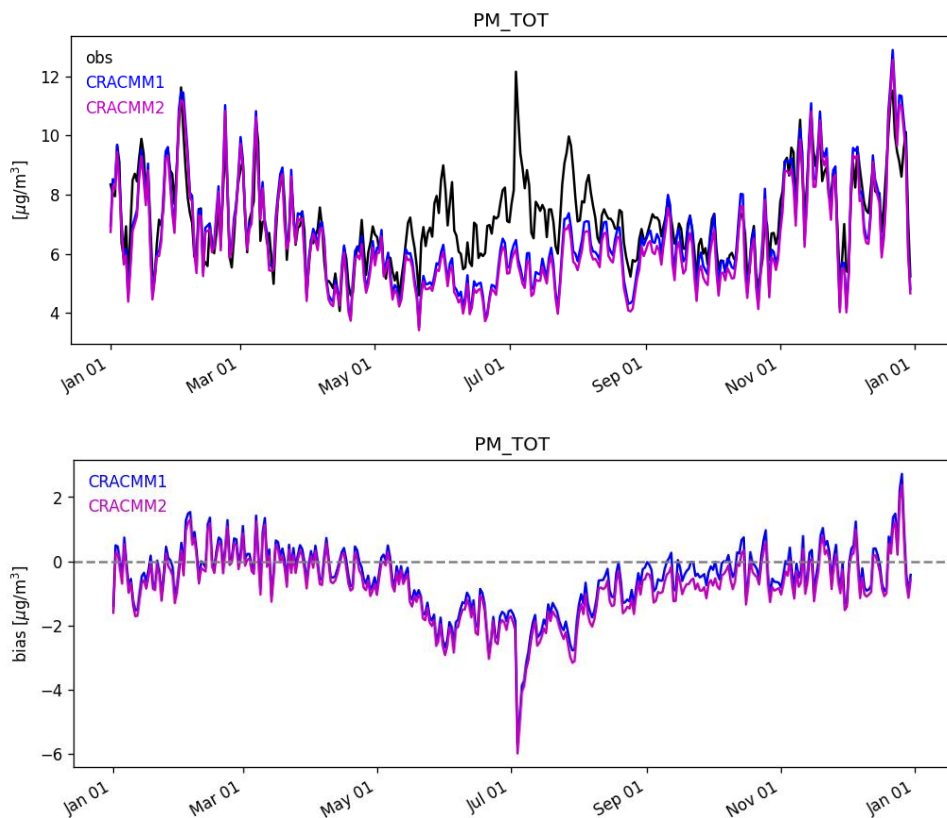

Figure S36. Daily average PM<sub>2.5</sub> (top) and bias (bottom) for 2019 averaged over all AQS monitoring sites for CRACMM1 and CRACMM2.

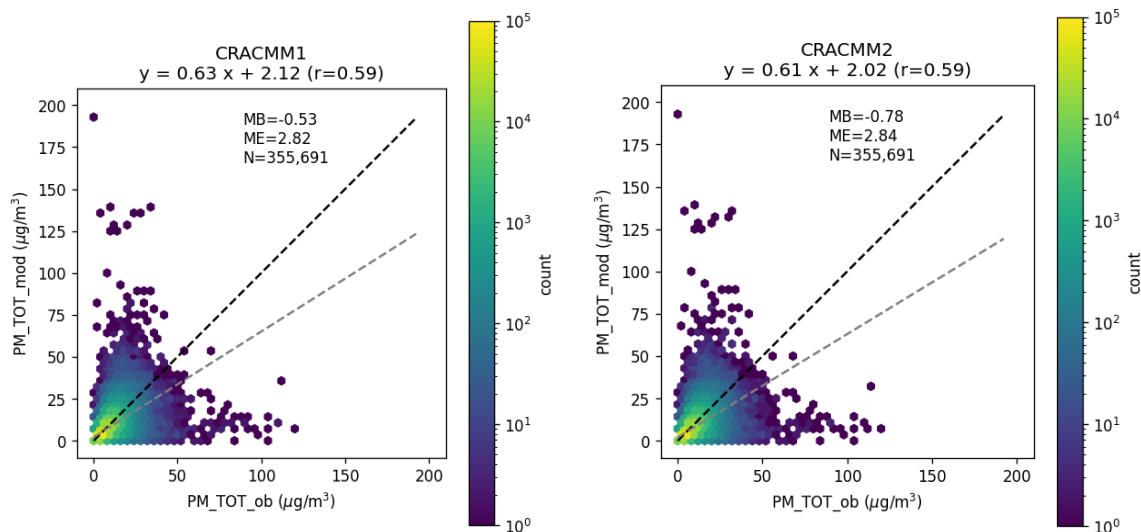

430

Figure S37. Density scatter plot of observed daily average PM<sub>2.5</sub> vs. CRACMM1 (left) and CRACMM2 (right). The mean bias (MB), mean error (ME), and number of observations (N) are indicated on each panel.

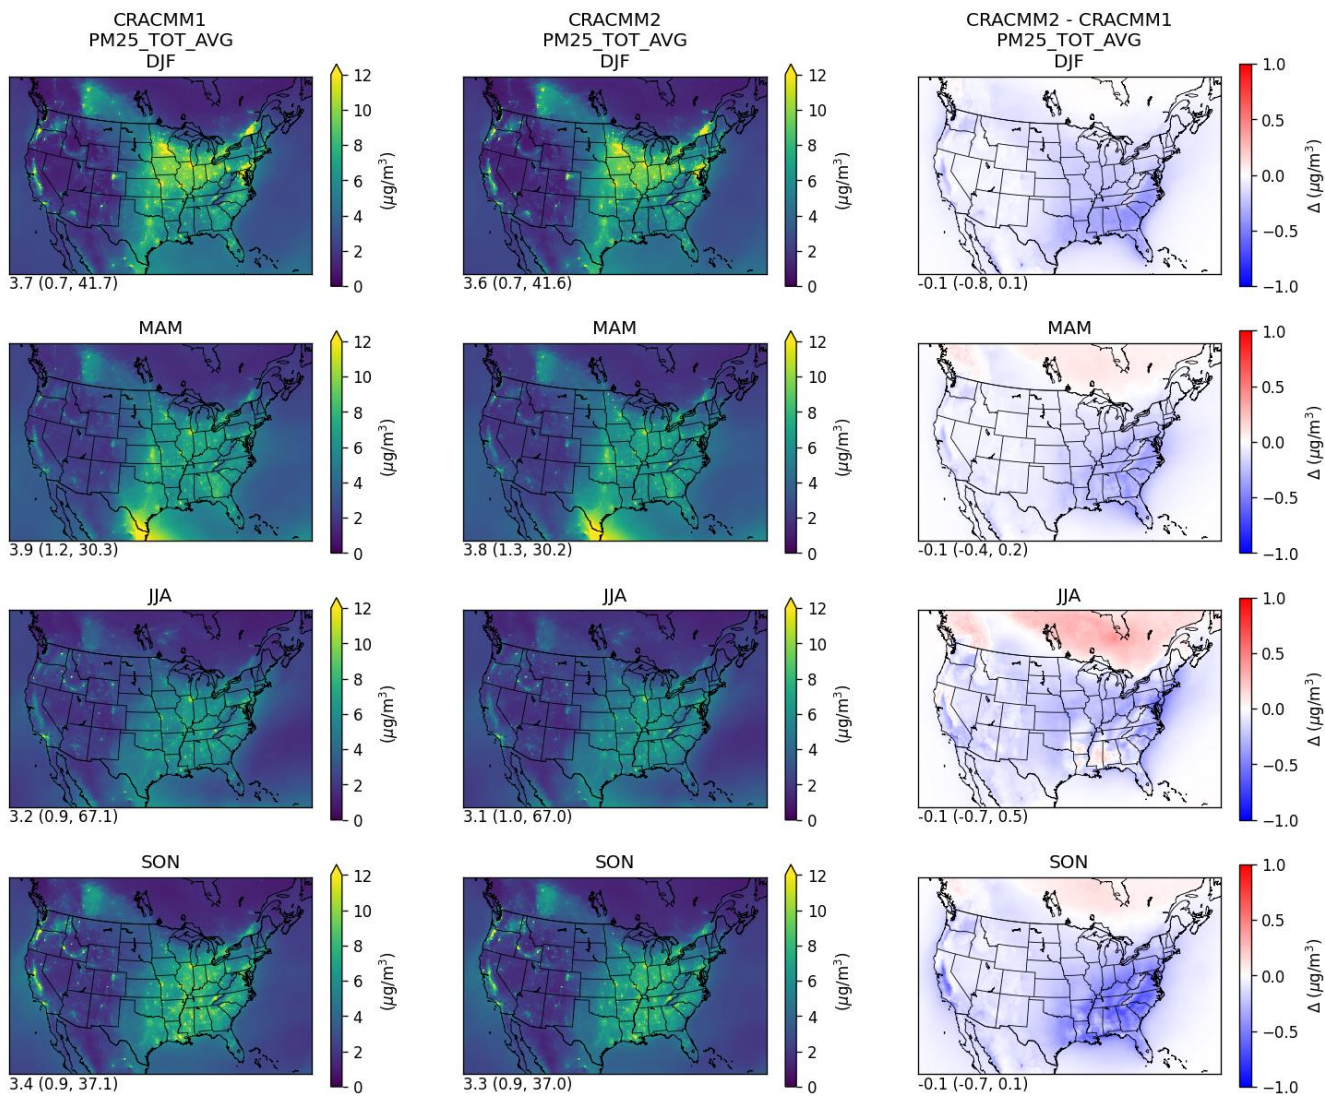

435 **Figure S38. Seasonal average PM<sub>2.5</sub> in CRACMM1 (left column) and CRACMM2 (middle column) and the change in CRACMM2 compared to CRACMM1 (right column). The annotations in the lower left show the mean (min, max) over the modeling domain.**

## References

- 440 Browne, E. C., Wooldridge, P. J., Min, K. E., and Cohen, R. C.: On the role of monoterpene chemistry in the remote continental boundary layer, *Atmos. Chem. Phys.*, 14, 1225-1238, 10.5194/acp-14-1225-2014, 2014.
- Fisher, J. A., Jacob, D. J., Travis, K. R., Kim, P. S., Marais, E. A., Chan Miller, C., Yu, K., Zhu, L., Yantosca, R. M., Sulprizio, M. P., Mao, J., Wennberg, P. O., Crouse, J. D., Teng, A. P., Nguyen, T. B., St. Clair, J. M., Cohen, R. C., Romer, P., Nault, B. A., Wooldridge, P. J., Jimenez, J. L., Campuzano-Jost, P., Day, D. A., Hu, W., Shepson, P. B., Xiong, F., Blake, D. R., Goldstein, A. H., Misztal, P. K., Hanisco, T. F., Wolfe, G. M., Ryerson, T. B., Wisthaler, A., and Mikoviny, T.: Organic nitrate chemistry and its implications for nitrogen budgets in an isoprene- and monoterpene-rich atmosphere: constraints from aircraft (SEAC4RS) and ground-based (SOAS) observations in the Southeast US, *Atmos. Chem. Phys.*, 16, 5969-5991, 10.5194/acp-16-5969-2016, 2016.
- 445 Ivatt, P. D., Evans, M. J., and Lewis, A. C.: Suppression of surface ozone by an aerosol-inhibited photochemical ozone regime, *Nature Geoscience*, 15, 536-540, 10.1038/s41561-022-00972-9, 2022.
- Jacob, D. J.: Heterogeneous chemistry and tropospheric ozone, *Atmospheric Environment*, 34, 2131-2159, [https://doi.org/10.1016/S1352-2310\(99\)00462-8](https://doi.org/10.1016/S1352-2310(99)00462-8), 2000.
- Jaffe, D. A., Ninneman, M., Nguyen, L., Lee, H., Hu, L., Ketcherside, D., Jin, L., Cope, E., Lyman, S., Jones, C., O'Neil, T., and Mansfield, M. L.: Key results from the salt lake regional smoke, ozone, and aerosol study (SAMOZA), *Journal of the Air & Waste Management Association*, 74, 163-180, 10.1080/10962247.2024.2301956, 2024.
- 455 KNMI: S5P/TROPOMI HCHO ATBD, 2022.
- Mouat, A. P., Siegel, Z. A., and Kaiser, J.: Evaluation of Aeris mid-infrared absorption (MIRA), Picarro CRDS (cavity ring-down spectroscopy) G2307, and dinitrophenylhydrazine (DNPH)-based sampling for long-term formaldehyde monitoring efforts, *Atmos. Meas. Tech.*, 17, 1979-1994, 10.5194/amt-17-1979-2024, 2024.
- 460 Pye, H. O. T., Luecken, D. J., Xu, L., Boyd, C. M., Ng, N. L., Baker, K. R., Ayres, B. R., Bash, J. O., Baumann, K., Carter, W. P. L., Edgerton, E., Fry, J. L., Hutzell, W. T., Schwede, D. B., and Shepson, P. B.: Modeling the Current and Future Roles of Particulate Organic Nitrates in the Southeastern United States, *Environmental Science & Technology*, 49, 14195-14203, 10.1021/acs.est.5b03738, 2015.
- Schwantes, R. H., Emmons, L. K., Orlando, J. J., Barth, M. C., Tyndall, G. S., Hall, S. R., Ullmann, K., St. Clair, J. M., Blake, D. R., Wisthaler, A., and Bui, T. P. V.: Comprehensive isoprene and terpene gas-phase chemistry improves simulated surface ozone in the southeastern US, *Atmos. Chem. Phys.*, 20, 3739-3776, 10.5194/acp-20-3739-2020, 2020.
- 465 U.S. EPA: Technical Support Document (TSD): Preparation of Emissions Inventories for the 2019 North American Emissions Modeling Platform, 2022.
- Vereecken, L. and Nozière, B.: H migration in peroxy radicals under atmospheric conditions, *Atmos. Chem. Phys.*, 20, 7429-7458, 10.5194/acp-20-7429-2020, 2020.
- 470 Wennberg, P. O., Bates, K. H., Crouse, J. D., Dodson, L. G., McVay, R. C., Mertens, L. A., Nguyen, T. B., Praske, E., Schwantes, R. H., Smarte, M. D., St. Clair, J. M., Teng, A. P., Zhang, X., and Seinfeld, J. H.: Gas-Phase Reactions of Isoprene and Its Major Oxidation Products, *Chemical Reviews*, 118, 3337-3390, 10.1021/acs.chemrev.7b00439, 2018.



- 475 Wisner, F., Place, B. K., Sen, S., Pye, H. O. T., Yang, B., Westervelt, D. M., Henze, D. K., Fiore, A. M., and McNeill, V. F.: AMORE-Isoprene v1.0: a new reduced mechanism for gas-phase isoprene oxidation, *Geosci. Model Dev.*, 16, 1801-1821, 10.5194/gmd-16-1801-2023, 2023.
- Yang, B., Wisner, F. C., McNeill, V. F., Fiore, A. M., Tao, M., Henze, D. K., Sen, S., and Westervelt, D. M.: Implementation and evaluation of the automated model reduction (AMORE) version 1.1 isoprene oxidation mechanism in GEOS-Chem, *Environmental Science: Atmospheres*, 3, 1820-1833, 10.1039/D3EA00121K, 2023.
- 480 Zhu, Q., Schwantes, R. H., Coggon, M., Harkins, C., Schnell, J., He, J., Pye, H. O. T., Li, M., Baker, B., Moon, Z., Ahmadov, R., Pfannerstill, E. Y., Place, B., Wooldridge, P., Schulze, B. C., Arata, C., Bucholtz, A., Seinfeld, J. H., Warneke, C., Stockwell, C. E., Xu, L., Zuraski, K., Robinson, M. A., Neuman, J. A., Veres, P. R., Peischl, J., Brown, S. S., Goldstein, A. H., Cohen, R. C., and McDonald, B. C.: A better representation of volatile organic compound chemistry in WRF-Chem and its impact on ozone over Los Angeles, *Atmos. Chem. Phys.*, 24, 5265-5286, 10.5194/acp-24-5265-2024, 485 2024.
